1 **Analysis host-recognition mechanism of staphylococcal kayvirus  $\phi$ SA039**  
2 **reveals a novel strategy that protects *Staphylococcus aureus* against infection**  
3 **by *Staphylococcus pseudintermedius* Siphoviridae phages**

4

5

6

7 **Authors:**

8 Aa Haeruman Azam<sup>1,3</sup>, Kenji Kadoi<sup>1</sup>, Kazuhiko Miyanaga<sup>1</sup>, Masaru Usui<sup>2</sup>, Yutaka Tamura<sup>2</sup>,  
9 Longzhu Cui<sup>3</sup>, and Yasunori Tanji<sup>1\*</sup>

10 <sup>1</sup>School of Life Science and Technology, Tokyo Institute of Technology, 4259 J2-15 Nagatsuta-  
11 cho, Midori-ku, Yokohama 226-8501, Japan.

12 <sup>2</sup>Graduate School of Veterinary Medicine, Rakuno Gakuen University, 582  
13 Bunkyoudaimidorimachi, Ebetsu-shi, Hokkaido 069-0836, Japan.

14 <sup>3</sup>Division of Bacteriology, Jichi Medical University, 3311-1 Yakushiji, Shimotsuke-shi, Tochigi  
15 329-0498

16 \* Correspondence author

17 Email: [ytanji@bio.titech.ac.jp](mailto:ytanji@bio.titech.ac.jp)

18 Tel.: +81-45-924-5763

19 Fax: +81-45-924-5818

20

## 21 Abstract

22 Following the emergence of antibiotic resistant bacteria such as methicillin-resistant  
23 *Staphylococcus aureus* (MRSA) and methicillin-resistant *Staphylococcus pseudintermedius*  
24 (MRSP), phage therapy has attracted significant attention as an alternative to antibiotic  
25 treatment. Bacteriophages belonging to kayvirus (previously known as Twort-like phages) have  
26 broad host range and are strictly lytic in *Staphylococcus* spp. Previous work revealed that  
27 kayvirus  $\phi$ SA039 has a host-recognition mechanism distinct from those of other known  
28 kayviruses: most of kayviruses use the backbone of wall teichoic acid (WTA) as their receptor;  
29 by contrast,  $\phi$ SA039 uses the  $\beta$ -N-acetylglucosamine ( $\beta$ -GlcNAc) residue in WTA. In this study,  
30 we found that  $\phi$ SA039 could switch its receptor to be able to infect *S. aureus* lacking the  $\beta$ -  
31 GlcNAc residue by acquiring a spontaneous mutation in open reading frame (ORF) 100 and  
32 ORF102. Moreover,  $\phi$ SA039 could infect *S. pseudintermedius*, which has a different WTA  
33 structure than *S. aureus*. By comparison with newly isolated *S. pseudintermedius*-specific phage  
34 (SP phages), we determined that glycosylation in WTA of *S. pseudintermedius* is essential for  
35 adsorption of SP phages, but not  $\phi$ SA039. Finally, we describe a novel strategy of *S. aureus*  
36 which protects the bacteria from infection of SP phages. Notably, glycosylation of ribitol  
37 phosphate (RboP) WTA by TarM or/and TarS prevents infection of *S. aureus* by SP phages.  
38 These findings could help to establish a new strategy for treatment of *S. aureus* and *S.*  
39 *pseudintermedius* infection, as well as provide valuable insights into the biology of phage-host  
40 interactions.

41 **Keyword:** Kayvirus, phage therapy, host-recognition mechanism, *Staphylococcus*  
42 *pseudintermedius*, *Staphylococcus aureus*

43

## 44 **Introduction**

45 *Staphylococcus* is a Gram-positive bacterium that causes many kinds of infections. Two  
46 representative species, *S. aureus* and *S. pseudintermedius*, are coagulase-positive bacteria that  
47 are notoriously pathogenic in humans and animals (Kloos and Bannerman 1994; Pompilio et al.  
48 2015). *S. aureus* is a commensal found on the skin and mucosae of humans, whereas *S.*  
49 *pseudintermedius* commonly inhabits dog skin. Both are common bacterial pathogens associated  
50 with chronic and recurrent skin infections that require long-term systemic antimicrobial therapy.  
51 Infection by *S. aureus* and *S. pseudintermedius* is becoming problematic due to the emergence of  
52 antibiotic-resistant strains, including methicillin-resistant (MRSA and MRSP) and vancomycin-  
53 resistant strains (VRSA) (Enright et al. 2002; Sakoulas et al. 2005). Virulent bacteriophages that  
54 can kill a wide range of *S. aureus* hosts represent promising alternatives to conventional  
55 antibiotic treatment (Alves et al. 2014; Iwano et al. 2018; Azam and Tanji 2019a). The success  
56 of phage infection depends on its host specificity, which is often determined by the interaction  
57 between a phage receptor-binding protein (RBP) and its cognate receptor on the surface of the  
58 host cell (Hyman and Abedon 2010).

59 Staphylococcal kayviruses (previously known as Twort-like phages) have broad host  
60 range and high lytic ability, making them suitable candidates for phage therapy (Łobocka et al.  
61 2012). Most phages belonging to this group use the backbone of wall teichoic acid (WTA), the  
62 most abundant molecule in the cell wall of *Staphylococcus*, as their receptor (Xia et al. 2011).  
63 However, previous work showed that kayvirus  $\phi$ SA039 uses the  $\beta$ -GlcNAc moiety in WTA of *S.*  
64 *aureus* SA003, a unique feature within the group (Azam et al. 2018).

65 The broad host range of kayviruses includes coagulase-negative staphylococci (CoNS)  
66 (Cui et al. 2012; Łobocka et al. 2012; Iwano et al. 2018). WTA in *S. aureus* generally consists of

67 repetitive 1,5-ribitol-phosphate (RboP) modified with a GlcNAc residue and D-alanine. The  
68 GlcNAc moieties are transferred onto WTA by the  $\alpha$ -GlcNAc transferase TarM and the  $\beta$ -  
69 GlcNAc transferase TarS (Xia et al. 2010; Brown et al. 2012). By contrast, WTA of *S.*  
70 *pseudintermedius* and CoNS has glycerol-phosphate (GroP) as the backbone and various  
71 glycoepitopes (GlcNAc, GalNAc, or Glc) (Endl et al. 1983; Winstel et al. 2014).

72         Staphylococcal phages that use glycoepitopes in the WTA as their receptors, e.g., phages  
73 from families *Siphoviridae* and *Podoviridae*, target either the RboP or GroP type of WTA. For  
74 example, *Siphoviridae*  $\phi$ 11 only recognizes GlcNAc of RboP WTA, whereas  $\phi$ 187 only  
75 recognizes the glycoepitope of GroP WTA (Winstel et al. 2014). Therefore, the unique feature of  
76  $\phi$ SA039, a kayvirus that requires the  $\beta$ -GlcNAc residue in the WTA of SA003 (RboP WTA),  
77 raises the question of whether this phage can also recognize other types of WTA from different  
78 *Staphylococcus* species. In this study, we evaluated the host range of  $\phi$ SA039 and its potential  
79 for phage therapy toward various strains of *S. pseudintermedius*, including MRSP. In addition,  
80 we also screened *S. pseudintermedius*-specific phages, evaluated them as potential antimicrobial  
81 agents, and compared them with  $\phi$ SA039.

82         In addition, a previous study showed that kayviruses such as  $\phi$ SA012 and  $\phi$ K have at  
83 least two RBPs (RBP1 and RBP2), which are responsible for these phages' broad host range  
84 (O'Flaherty et al. 2004; Takeuchi et al. 2016). Mutant  $\phi$ SA012 has a modified RBP2 (ORF103)  
85 that enables the phage to infect mutant *S. aureus* SA003R38, which has an altered WTA and  
86 overproduces capsular polysaccharide (Takeuchi et al. 2016; Osada et al. 2017; Azam et al.  
87 2018), indicating that mutated RBP2 may allow the phage to counter-adapt to resistant hosts by  
88 using an alternative component as a novel receptor (Takeuchi et al. 2016). Like  $\phi$ SA012,  
89  $\phi$ SA039 also has two RBPs, RBP1 (ORF100) and RBP2 (ORF102) (Azam et al. 2018). Hence,

90 in light of the unique infection strategy of  $\phi$ SA039, we also investigated the ability of the phage  
91 to counter-adapt to phage-resistant host and analyzed the underlying mechanism.

## 92 **Material and Methods**

### 93 **Bacterial strains, bacteriophages, and plasmids**

94 Bacteria, phages, and plasmids used in this study are listed in Table 1. *S. aureus* RN4220  
95 was used with the permission of Professor Richard P. Novick (Skirball Institute of Biomolecular  
96 Medicine, New York, NY, USA). *S. aureus* SA003 was isolated from milk of a mastitic cow  
97 (Synnott et al. 2009). The *S. aureus* virulent phages  $\phi$ SA039 and  $\phi$ SA012 were isolated from  
98 sewage in Japan (Synnott et al. 2009). All *S. pseudintermedius* isolates were isolated from the  
99 skin of dogs with canine pyoderma. Nine coagulase-negative *Staphylococcus* (CoNS) were  
100 isolated from a patient at Jichi Medical University hospital, and species identification was  
101 performed based on the 16S rRNA gene. *S. aureus* SA003, *S. pseudintermedius* SP015, *S.*  
102 *pseudintermedius* SP070, and *S. pseudintermedius* SP079 were deposited in the culture  
103 collection of NITE Biological Research Center, Kisarazu, Japan, under accession numbers  
104 NBRC110650, NBRC113855, NBRC113857 and NBRC113858, respectively. All phages used  
105 in this study are deposited in the corresponding author's institution and distributed to other  
106 researcher by request. All primers used in this study are listed in Supplemental Table S1.

### 107 **Isolation of *S. pseudintermedius***

108 *Staphylococcus* was isolated based on standard culture and biochemical tests on site. Screening  
109 of *S. pseudintermedius* was performed using the API®/ID32 kit (Sysmex-bioMérieux, Tokyo,  
110 Japan). To distinguish *S. pseudintermedius* and *S. intermedius*, restriction fragment length  
111 polymorphism (RFLP) analysis was performed on the *kat* gene (Blaiotta et al. 2010). *S.*

112 *pseudintermedius* strains were distinguished by PCR amplification of the hypervariable X region  
113 of the protein A gene (*spa*) (Moodley et al. 2009). Multilocus sequence typing (MLST) was  
114 performed following Bannoehr's method, which targets five genes (16SrRNA, *tuf*, *cpn60*, *pta*,  
115 and *agrD*) (Bannoehr et al. 2007; Bannoehr et al. 2009).

## 116 **Bacteriophage isolation and purification**

117 Phage  $\phi$ DP001, which is capable of lysing *S. pseudintermedius*, was isolated from dog  
118 saliva. Saliva was collected using sterile cotton swabs, which were soaked in 1 ml SM buffer  
119 (100 mM NaCl, 8 mM MgSO<sub>4</sub>, 50 mM Tris-HCl [pH 7.5], 0.01% gelatin), and incubated at 4°C  
120 for at least 1 h. After centrifugation (9730 g, 1 min), 100  $\mu$ l supernatant was mixed with 100  $\mu$ l  
121 overnight culture of *S. pseudintermedius* SP015 in 3 ml of 0.5% top agar, plated on LB agar, and  
122 incubated at 37°C overnight.  $\phi$ SP120,  $\phi$ SP197, and  $\phi$ SP276 were isolated by mitomycin  
123 induction; Mitomycin was added into *S. epidermidis* culture (OD = 0.5) at a final concentration  
124 of 0.5  $\mu$ g/ml and incubated for 1 h. Phages were isolated from the supernatant after  
125 centrifugation (9730 g, 3 minutes). Propagation and purification of the phages was performed as  
126 previously described (Synnott et al. 2009).

## 127 **Plaque assay and efficiency of plating (EOP)**

128 Plaque assay was performed by mixing 100  $\mu$ l of phage (10<sup>4</sup> PFU/ml) with 100  $\mu$ l  
129 overnight culture of bacteria in 3 ml of 0.5% top agar, plated on LB agar, and incubated at 37°C  
130 overnight. Experiments were conducted in triplicate. The EOP value was measured as a  
131 percentage of the number of observed plaques on the tested bacteria divided by the number of  
132 plaques observed on the wild-type strain.

## 133 **Spot test**

134 Two microliters of phage lysate at a titer of  $10^8$  plaque forming units (PFU) per ml ( $10^5$   
135 PFU) was dropped onto a lawn of bacteria and incubated overnight at  $37^\circ\text{C}$ . Experiments were  
136 conducted in triplicate.

### 137 **Adsorption assay**

138 The adsorption efficiency of phages on *S. aureus* strains was measured by titrating the  
139 presence of free phages in the supernatant after 20 minutes of cell–phage contact following  
140 previous study (Azam et al. 2018). Free phage was collected by centrifugation ( $9730 \times g$ , 1 min)  
141 and titrated using SA003 for  $\phi\text{SA039}$  and SP070 for SP phages.

### 142 **Isolation and characterization of spontaneous mutant of $\phi\text{SA039}$**

143 Co-culture experiments were performed with *S. aureus* SA003 and  $\phi\text{SA039}$ . First, 4.5 ml  
144 of LB broth was inoculated with 1% overnight culture of SA003 and cultured until early  
145 exponential phase ( $\text{OD}_{660}=0.1$ ) in a TVS062CA BioPhotorecorder (Advantec, Tokyo, Japan).  
146 Then, phage  $\phi\text{SA039}$  was added at a multiplicity of infection ( $\text{MOI} = 1$ ). The mixture was  
147 cultured at  $37^\circ\text{C}$  with shaking at 40 rpm. After 2 days, the culture was transferred to 4.5 ml of  
148 fresh LB medium (1% dilution) and cultured under the same condition. Co-cultures were  
149 repeated until a spontaneous mutant of  $\phi\text{SA039}$  that could infect TarS-null *S. aureus* was  
150 isolated. Two spontaneous mutants were isolated from the co-culture and were designated  $\phi\text{M1}$   
151 and  $\phi\text{M2}$ .

### 152 **Checking for mutations in genes encoding tail and baseplate proteins**

153 Genes encoding tail and baseplate proteins (ORF95–ORF102) in spontaneous mutant  
154 phages were amplified by plaque PCR using DirectAmpPCR (TAKARA, Shiga, Japan) and

155 analyzed by Sanger sequencing. Phage plaques were touched with a toothpick and mixed into the  
156 PCR mixtures.

### 157 **Generation and characterization of chimeric phage**

158 Chimeric phage was generated by homologous recombination using plasmid pNL9164  
159 (Sigma-Aldrich, MO, USA) in *S. aureus* SA003. Mutated DNA fragments of ORF100 and  
160 ORF102 were amplified from spontaneous mutant phages by PCR using KOD-plus Neo enzyme  
161 (Toyobo, Shiga, Japan). PCR fragments and the plasmid were digested with appropriate  
162 restriction enzymes. The DNA fragment was inserted into plasmid pNL9164 using T4 DNA  
163 Ligase (New England BioLabs, Ipswich, MA, USA). The constructed plasmid was cloned into  
164 *Escherichia coli* JM109 competent cells (TAKARA, Shiga, Japan) and pre-introduced into  
165 restriction-deficient *S. aureus* RN4220 before being transformed into *S. aureus* SA003.

166 To perform homologous recombination, transformant SA003 harboring plasmid with  
167 homologous region was infected with phage (MOI = 1). The mixture was incubated at 37°C  
168 overnight. Recombinant phages were isolated from the supernatant fraction of the mixture after  
169 centrifugation (8000 × g, 3 minutes). SA003ΔTarS was used to screen recombinant phages from  
170 homologous recombination of ORF100, and RN4220 was used to screen recombinant phages  
171 from homologous recombination of ORF102. Mutated ORF100 from spontaneous mutant phage  
172 φM1 was introduced into wild-type φSA039, yielding chimeric phage φrM1/r-100. Mutated  
173 ORF102 of φM1 was introduced into φrM1/r-100, yielding chimeric phage φrM1/r-100&102.

### 174 **Deletion of *oatA* gene in RN4220ΔtarMΔtarS**

175 The gene was deleted by pCasSA plasmid with clustered regularly interspaced short  
176 palindromic repeats (CRISPR)-Cas9 system (Chen et al. 2017). Plasmid construction was



177 performed as previously described (Chen et al. 2017; Azam et al. 2018). Spacers were manually  
178 selected by searching the protospacer adjacent motif (PAM) region. Two oligos were designed as  
179 single-stranded DNA for each spacer, and double-stranded spacer was generated by  
180 phosphorylation with T4 PNK (New England BioLabs, Ipswich, MA, USA) and annealed at  
181 95°C for three minutes. Plasmid pCasSA was digested with *Bsa*I. The double-stranded spacer  
182 and digested pCasSA were ligated with T4 DNA ligase (New England BioLabs, Ipswich, MA,  
183 USA). Editing template was amplified by splicing by overlap extension (SOE) PCR using the  
184 region flanking the target gene as the DNA template. The resultant plasmid was cloned into  
185 *Escherichia coli* JM109 competent cells (TAKARA, Shiga, Japan) and transformed into *S.*  
186 *aureus* RN4220 $\Delta$ tarM $\Delta$ tarS. Complementation of deletion mutants was performed using plasmid  
187 pLI50 (purchased from Addgene [Cambridge, MA]) under the control of the P3 promoter  
188 (pLIP3) (Jeong et al. 2011; Takeuchi et al. 2016). The wild-type allele from RN4220 was used as  
189 the insert.

### 190 **Selection of phage-resistant mutants of *S. pseudintermedius* SP015**

191 Plaque assays were performed using SP015 and  $\phi$ SA039 at an MOI = 10 and incubated at  
192 37°C overnight. Colonies (resistant mutants) were purified, inoculated onto LB plates, and  
193 incubated at 37°C overnight. The phage resistance of isolated mutants was determined by spot  
194 test and adsorption assay. Phage-resistant SP015-R1 which showed ability to inhibit phage  
195 adsorption was further characterized.

### 196 **DNA extraction, sequencing, and bioinformatics**

197 Phage genome was extracted using phage DNA isolation kit (NORGEN, ON, Canada).  
198 Bacterial genome was extracted using DNA extraction kit (Sigma-Aldrich, St. Louis, MO, USA).

199 Whole-genome sequencing was conducted on the Illumina HiSeq platform with genome  
200 coverage (sequencing depth) of 100-fold. Genomes were assembled using velvet ver 1.2.10.  
201 ORFs were predicted and annotated using the RAST server (<http://rast.nmpdr.org/>). The presence  
202 of toxin or virulence genes in the phage genome was determined using PHASTER (PHAge  
203 Search Tool Enhanced Release) server ([phaster.ca](http://phaster.ca)).

#### 204 **Statistical analysis**

205 Two-tailed Student's *t*-test was used to determine statistical significance.

#### 206 **Accession number (s)**

207 Genome data of three SP phages ( $\phi$ SP120,  $\phi$ SP197, and  $\phi$ SP276) and *S. pseudintermedius* SP079  
208 were submitted to the DNA Data Bank of Japan (DDBJ) database under accession numbers  
209 AP019560, AP019561, AP019562, and AP019372, respectively.

210

## 211 Results

### 212 $\phi$ SA039 can recognize WTA of *Staphylococcus pseudintermedius* SP015

213  $\phi$ SA039 exhibited at least a moderate ability to infect various strains of *S.*  
214 *pseudintermedius*, and 12 CoNS (Table 2). A close relative of  $\phi$ SA039,  $\phi$ SA012, also had a  
215 broad host range toward the *Staphylococcus* species we tested. In this study, we also isolated *S.*  
216 *pseudintermedius*-specific phages (SP phages)  $\phi$ DP001,  $\phi$ SP120,  $\phi$ SP197, and  $\phi$ SP276, and  
217 compared them with  $\phi$ SA012 and  $\phi$ SA039.

218 As shown in Table 2, in 20 isolates of *S. pseudintermedius*,  $\phi$ SA012 and  $\phi$ SA039  
219 exhibited at least a moderate infection (turbid plaque):  $\phi$ SA012 infected 95% of isolates (19/20),  
220 whereas  $\phi$ SA039 infected 90% (18/20).  $\phi$ SA012 and  $\phi$ SA039 could infect 93% of *S. aureus*  
221 isolates (13/14) and the 12 CoNS. Unlike  $\phi$ SA012 and  $\phi$ SA039, no SP phages could infect the *S.*  
222 *aureus* strains used in this study. Regarding *S. pseudintermedius*,  $\phi$ DP001 infected 50% of  
223 isolates (10/20), whereas the other three SP phages infected 95% of isolates (19/20). *S.*  
224 *pseudintermedius* SP079 was the only strain that was resistant against all SP phages. Whole-  
225 genome analysis revealed that this bacterium encodes CRISPR-Cas9 system in its genome. DNA  
226 fragments of  $\phi$ SP120 and  $\phi$ SP197 were identified in the CRISPR regions of the two SP079  
227 (Supplementary Table 1). Four SP phages formed at least turbid plaques in CoNS, with the  
228 exception of *Staphylococcus saprophyticus*.

229 We speculated that SP phages recognize receptors in *S. pseudintermedius* and CoNS  
230 isolates that are absent in *S. aureus*. Because most staphylococcal phages require WTA as their  
231 receptor (Azam and Tanji 2019b), we sought to determine whether our SP phages also require  
232 WTA. To this end, we generated WTA-free *Staphylococcus* by inhibiting WTA synthesis in the

233 cell using tunicamycin (Zhu et al. 2018).  $\phi$ SA039,  $\phi$ SA012, and three SP phages ( $\phi$ DP001,  
234  $\phi$ SP120, and  $\phi$ SP197) had no ability to infect WTA-free *S. pseudintermedius* and *S. epidermidis*  
235 (data not shown). The phages could not form a plaque and failed to adsorb onto WTA-free  
236 isolates. By contrast,  $\phi$ SP276 did not completely lose its infectivity toward WTA-free isolates,  
237 indicating that phage can use another component as a receptor. These findings indicated that all  
238 phages in this study utilize WTA in *S. pseudintermedius* and *S. epidermidis* as their receptor, but  
239 that the WTA of these bacteria is likely distinct from that of *S. aureus*.

#### 240 **Accumulation of point mutations in ORF100 enables $\phi$ SA039 to infect TarS-null *S. aureus***

241  $\phi$ SA039 requires  $\beta$ -GlcNAc glycosylation of WTA by TarS (Azam et al. 2018). In this  
242 study, we found that  $\phi$ SA039 could generate spontaneous mutants capable of infecting TarS-null  
243 *S. aureus*. Mutants of  $\phi$ SA039 that could infect TarS-null *S. aureus* were obtained from the fifth  
244 batch of two co-cultures. One spontaneous mutant phage ( $\phi$ M1 and  $\phi$ M2) was purified from each  
245 of co-culture and further characterized. In SA003 $\Delta$ tarS, adsorption of  $\phi$ M1 and  $\phi$ M2 was around  
246 8-fold than that of wild-type  $\phi$ SA039 (Fig 1a).  $\phi$ M1 and  $\phi$ M2 exhibited similar adsorption toward  
247 SA003 $\Delta$ tarS. Because the phage tail fiber and baseplate region are thought to be involved in  
248 phages' adsorption specificity, we amplified the genomic region encoding the tail and baseplate  
249 proteins (ORF94 until ORF102) using primers described in Supplemental Table S1. Spontaneous  
250 mutations were detected in ORF100 and ORF102.  $\phi$ M1 harbors three point mutations in ORF100  
251 and one point mutation in ORF102, whereas  $\phi$ M2 only has three point mutations in ORF100. All  
252 mutations changed the amino acid sequence of the protein. The mutations in ORF100 were  
253 distributed among five locations (one near the N-terminus, two in the middle, and two near the  
254 C-terminus). A point mutation located at base 623 (TCT, S  $\rightarrow$  TAT, Y) was detected in both  
255 mutant phages. Point mutations at bases 907 (GAT, D  $\rightarrow$  TAT, N) and 1850 (ACG, T  $\rightarrow$  AGG,

256 R) were detected in  $\phi$ M1, whereas mutations at bases 1012 (GAA, E  $\rightarrow$  AAA, K) and 1844  
257 (ACA, T  $\rightarrow$  AAA, K) were detected in  $\phi$ M2. The mutation in ORF102 was located in the C-  
258 terminus at base 1116 (AAA, K  $\rightarrow$  ACA, T).

259 Because all  $\phi$ SA039 mutants had spontaneous base changes in ORF100, we speculated  
260 that these mutations enabled the phages to infect SA003 $\Delta$ tarS. We hypothesized that by  
261 introducing the point mutation in ORF100 into wild type  $\phi$ SA039, we should be able to construct  
262 chimeric  $\phi$ SA039 capable of infecting SA003 $\Delta$ tarS. Hence, we introduced ORF100 of  $\phi$ M1 into  
263 wild-type  $\phi$ SA039 by homologous recombination, yielding the chimeric phage  $\phi$ rM1/r-100.

264 Spot tests revealed that  $\phi$ rM1/r-100 could infect SA003 $\Delta$ tarS (data not shown). We then  
265 performed an adsorption assay to determine whether the ability of the recombinant phages to  
266 infect SA003 $\Delta$ tarS was due to an effect of adsorption as a result of replacement of ORF100.  
267 Indeed, adsorption of  $\phi$ rM1/r-100 on SA003 $\Delta$ tarS was significantly elevated relative to wild-type  
268  $\phi$ SA039 (Fig. 1a).

### 269 **The $\alpha$ -GlcNAc residue in WTA blocks the infection of mutant $\phi$ SA039 lacking a mutation** 270 **in ORF102**

271 *S. aureus* SA003 naturally lacks the gene encoding glycosyltransferase TarM (genome  
272 accession number: AP018376). Because certain *S. aureus* strains have *tarM* and *tarS* in their  
273 genome (Brown et al. 2012), in this study, we also used *S. aureus* RN4220, which has a complete  
274 set of WTAs (genome accession number: GCA\_000212435.2), to characterize the mutant phage.  
275 As shown in Fig. 1b, wild-type  $\phi$ SA039 could not infect RN4220 $\Delta$ tarS or RN4220 $\Delta$ tarM $\Delta$ tarS.  
276 However, mutant phages  $\phi$ M1 and  $\phi$ M2 exhibited completely different patterns of infectivity in  
277 the presence of *tarM*. Infection of  $\phi$ M2 was severely impaired toward RN4220, which has *tarM*.

278 Only 3.86% of  $\phi$ M2 could adsorb onto RN4220, whereas 38.93% of  $\phi$ M1 could do so. Deletion  
279 of the *tarM* gene in RN4220 (RN4220 $\Delta$ TarM) improved adsorption of  $\phi$ M1 and  $\phi$ M2 to 63.97%  
280 and 28.04%, respectively. A similar pattern was observed in RN4220 $\Delta$ TarS. The presence of  
281 *tarM* in RN4220 $\Delta$ TarS decreased the adsorption efficiency of both  $\phi$ M1 and  $\phi$ M2, and  
282 conversely, deletion of *tarM* in RN4220 $\Delta$ TarS (RN4220 $\Delta$ TarM $\Delta$ TarS) improved the adsorption  
283 of both mutant phages. Overall, the mutations in  $\phi$ M1 and  $\phi$ M2 decreased the ability of the  
284 phages to adsorb onto WTA glycosylated by TarM; in particular, adsorption of  $\phi$ M2 was almost  
285 completely abolished.

286 As with  $\phi$ M2, the chimeric phage  $\phi$ rM1/r-100 was unable to adsorb onto RN4220  
287 (6.06%), but was infectious toward RN4220 $\Delta$ TarM (14.60% adsorbed phage). Based on this  
288 observation, we hypothesized that the absence of a point mutation in ORF102 in  $\phi$ M2 and  
289  $\phi$ rM1/r-100 may make these phages unable to infect RN4220. To test this idea, we introduced a  
290 point mutation in ORF102 into  $\phi$ rM1/r-100 by homologous recombination, yielding the chimeric  
291 phage  $\phi$ rM1/r-100&102. Indeed, adsorption of the chimeric phage  $\phi$ rM1/r-100&102 improved  
292 three times higher than that of  $\phi$ rM1/r-100 (fig 1b).

### 293 **Whole-genome sequencing of SP phages**

294 Because  $\phi$ SP120,  $\phi$ SP197, and  $\phi$ SP276 had a broad host range in *S. pseudintermedius*,  
295 we further investigated their potential as antimicrobial agents. To this end, we first sequenced the  
296 entire genomes of all three phages. In doing so, our primary goal was to investigate the presence  
297 of toxin, virulence, and antibiotic-resistance genes that could make them inappropriate for phage  
298 therapy.

299 The whole-genome sequencing analysis revealed that  $\phi$ SP120,  $\phi$ SP197, and  $\phi$ SP276  
300 belong to *Siphoviridae*, with genome sizes of 40530, 41149, and 40711 bp, respectively. The GC  
301 content of  $\phi$ SP120,  $\phi$ SP197, and  $\phi$ SP276 was similar to that of *S. pseudintermedius*, but  
302 somewhat higher than that of *S. aureus* (36%, 35%, and 36%, respectively). The genomes of the  
303 phages had a low degree of identity relative to one another. Their genomes were organized into  
304 six functional modules; lysogeny, DNA replication, packaging, head, tail, and lysis. The  
305 presence of integrase (CI) and repressor (Cro) genes in the genome indicate that these phages can  
306 undergo a lysogenic cycle (Xia and Wolz 2014). The integrases of the three phages were  
307 identical. Toxin, virulence, and antibiotic-resistance genes were absent from all three genomes,  
308 according to the PHASTER server.

309 Using the ViPTree online tool (<https://www.genome.jp/viptree>), we found that these  
310 phages are phylogenetically close to  $\phi$ 187 (Genome accession number: [NC\\_007047](#)).  $\phi$ 187 is a  
311 *Siphoviridae* phage isolated from the *S. aureus* ST395 lineage by mitomycin C induction  
312 (Asheshov and Jevons 1963). Other phages evolutionarily close to our SP phages were Stb27  
313 (Genome accession number: [NC\\_019914](#)) and StB12 (Genome accession number: [NC\\_020490](#)),  
314 both of which were isolated from CoNS *Staphylococcus hominis* through mitomycin C induction  
315 (Deghorain et al. 2012). The WTA structure of the *S. aureus* ST395 lineage and CoNS are  
316 similar to that of *S. pseudintermedius* (Winstel et al. 2014).

### 317 **WTA of *S. pseudintermedius* is different to that of *S. aureus***

318 Because SP phages cannot infect *S. aureus*, we speculated that the WTA of *S.*  
319 *pseudintermedius* is distinct from that of *S. aureus*. To date, the known WTAs of *Staphylococcus*  
320 bacteria are of at least two types, GroP and RboP (Brown et al. 2013; Winstel et al. 2014). Using

321 primers targeting the *tagF* gene, which encodes the GroP polymerase of *S. pseudintermedius*  
322 ED99, we determined that all *S. pseudintermedius* in our study likely possess GroP type WTA.  
323 Most of the isolates had WTA clusters similar to that of ED99 (genome accession number:  
324 NC\_017568). Genes encoding glycosyl transferases TarM and TarS were absent from *S.*  
325 *pseudintermedius* isolates. As with *S. pseudintermedius*, CoNS also have GroP WTA (Endl et al.  
326 1983; Winstel et al. 2014). Therefore, our SP phages may specifically recognize GroP WTA,  
327 whereas  $\phi$ SA012 and  $\phi$ SA039 recognize both GroP and RboP WTA.

328  $\phi$ 187 can utilize WTA of *S. aureus* PS187, which belongs to the ST395 lineage, but not  
329 that of the common *S. aureus* lineage (Winstel et al. 2014). Unlike other *S. aureus*-type strains,  
330 *S. aureus* ST395 has GroP WTA with  $\alpha$ -GalNAc glycosylation mediated by TagN (Winstel et al.  
331 2013, Winstel et al. 2014). In this study, we detected the presence of *tagN* in most *S.*  
332 *pseudintermedius* isolates. However, *S. pseudintermedius* SP070 and SP190 lacked *tagN* but had  
333 a gene encodes glycosyltransferase that absent from other isolates (unpublished data).

### 334 **SP phages can recognize non-glycosylated RboP WTA in *S. aureus***

335 WTA sugar modifications are highly variable in *Staphylococcus* species, and have been  
336 implicated in bacteriophage susceptibility and immunogenicity (Brown et al. 2013). The WTA of  
337 *S. aureus* contains  $\alpha$ -GlcNAc and/or  $\beta$ -GlcNAc. In this study, we found that although no SP  
338 phages could infect *S. aureus* (Table 2), the absence of  $\alpha$ -GlcNAc and  $\beta$ -GlcNAc in the WTA  
339 enabled the SP phages to infect this bacterium. SP phages could infect *S. aureus*  
340 RN4220 $\Delta$ TarM $\Delta$ TarS and SA003 $\Delta$ TarS, both of which lack the GlcNAc modification in their  
341 WTA (Fig 2). Because SA003 naturally lacks TarM, SA003 $\Delta$ TarS has a WTA similar to that of  
342 RN4220 $\Delta$ TarM $\Delta$ TarS. Although the observed plaques were slightly turbid, SP phages could



343 adsorb onto RN4220 $\Delta$ TarM $\Delta$ TarS (Fig 2). Adsorption efficiencies of  $\phi$ SP120,  $\phi$ SP197, and  
344  $\phi$ SP276 onto RN4220 $\Delta$ TarM $\Delta$ TarS were 40.34%, 32.69%, and 43.75%, respectively.  
345 Complementation of either TarM ( $\alpha$ -GlcNAc) or TarS ( $\beta$ -GlcNAc) blocked infection by SP  
346 phages; however, the complete absence of WTA in RN4220 $\Delta$ tagO also prevented infection.  
347 Thus, SP phages can utilize non-glycosylated WTA as their recognition site on *S. aureus* cells.

348 6-O acetylation of muramic acid residues in peptidoglycan of *S. aureus* decreases the  
349 adsorption ability of staphylococcal *Siphoviridae* phages  $\phi$ 11 and  $\phi$ 52A (Li et al. 2016). To  
350 determine whether peptidoglycan acetylation is involved in SP phage adsorption onto RN4220  
351  $\Delta$ TarM $\Delta$ TarS, we generated a deletion mutant of *oatA* and used this strain as a host for the  
352 adsorption assay. We did not observe a change in the adsorption of SP phages relative to  
353 RN4220 $\Delta$ TarM $\Delta$ TarS (data not shown), suggesting that peptidoglycan acetylation is not  
354 essential for SP phage adsorption onto *S. aureus*.

### 355 **Glycoepitope of WTA in SP015 is essential for SP phages**

356 Staphylococcal *Siphoviridae* phages require glycosylated WTA as their receptor (Xia et  
357 al. 2011). In RboP WTA, *Siphoviridae* phages recognize the GlcNAc residue, regardless of its  
358 stereochemistry. However, the host recognition mechanism of *Siphoviridae*, which recognizes  
359 GroP WTA, remains poorly understood. To analyze the host recognition mechanism of our SP  
360 phages, we generated phage-resistant *S. pseudintermedius* SP015.

361 Reduced adsorption of three SP phages was observed in phage-resistant SP015 R1 (Fig  
362 3). Using primers targeting the WTA gene cluster in SP015, we identified a point mutation in  
363 *tagN* of R1 that caused a premature stop codon at amino acid 629 (Fig 3a). Complementation of  
364 *tagN* using a wild-type allele restored adsorption of SP phages around 50%. Notable, mutation in

365 R1 improved adsorption of  $\phi$ SA039 (56.20%), whereas complementation of *tagN* in R1  
366 decreased adsorption of  $\phi$ SA039 (31.70%). In SP015 and its mutant derivatives, adsorption did  
367 not differ significantly between mutant  $\phi$ SA039 ( $\phi$ M1,  $\phi$ M2,  $\phi$ rM1/r-100, and  $\phi$ rM1/r-100&102)  
368 and wild-type  $\phi$ SA039 (Supplemental Figure S2).

369

## 370 **Discussion**

### 371 **Alteration of RBP enables $\phi$ SA039 to switch its receptor**

372 Although  $\phi$ SA039 requires the  $\beta$ -GlcNAc moiety in WTA of *S. aureus*, it can switch its  
373 receptor by acquiring spontaneous mutation in its RBP. Alteration of phage receptors is a  
374 bacterial strategy used to prevent the initial step of phage infection (Capparelli et al. 2010;  
375 Hyman and Abedon 2010; Azam and Tanji 2019a). A previous study showed that spontaneous  
376 mutant *S. aureus* lacking the  $\beta$ -GlcNAc moiety in WTA can be easily obtained by co-culturing  
377 the bacteria with phage (Azam et al. 2018), suggesting that the emergence of phage-resistant *S.*  
378 *aureus* lacking  $\beta$ -GlcNAc moiety in WTA is possible in a real-world setting. However, in  
379 contrast to the situation with antibiotic resistance,  $\phi$ SA039 can counter-adapt phage-resistant  
380 host by acquiring mutations in ORF100. We confirmed that mutation in ORF100 is key to  
381  $\phi$ SA039's ability to infect TarS-null *S. aureus*. Spontaneous mutants with three point mutations  
382 in ORF100 could infect a TarS-null host. Chimeric phages harboring mutant ORF100, produced  
383 by homologous recombination, also exhibited similar infectivity. However, a phage with mutated  
384 ORF100 could not infect *S. aureus* RN4220, which has TarM (an enzyme responsible for  
385 glycosylation of  $\alpha$ -GlcNAc of WTA). This residue is likely important for the infection of  
386 RN4220 by  $\phi$ SA039. Mutation in ORF100 caused the loss of binding ability of  $\phi$ SA039 onto

387 RN4220. Our hypothesis was consistent with these observations:  $\phi$ M2 and  $\phi$ rM1/r-100 could  
388 infect TarM-null RN4220 (RN4220 $\Delta$ TarM), and complementation of TarM in RN4220 $\Delta$ TarM  
389 blocked the infection of the phages.

390 Subsequent analysis revealed that a point mutation in ORF102 enabled the mutant phage  
391 to adsorb onto RN4220. Phage  $\phi$ M1, which has mutations in ORF100 and ORF102, was able to  
392 bind WTA of RN4220. Our hypothesis is consistent with the ability of a chimeric phage  
393 harboring point mutations in ORF100 and ORF102 ( $\phi$ rM1/r-100&102) to infect RN4220.

394 A similar phenomenon has been documented in phages infecting *Escherichia coli*:  
395 mutation in *gp38*, which encodes the tail protein of coliphage PP01, enables PP01 to infect *E.*  
396 *coli* O157:H7 lacking the receptor OmpC (Morita et al. 2002). Via such mutations,  $\phi$ SA039 and  
397 PP01 may acquire the ability to target new receptors other than their original cognate receptors.  
398 These indicate that even if the phage-resistant bacteria may appear, new infectious phage will  
399 nevertheless be available.

#### 400 **Staphylococcal kayvirus from family *Myoviridae* is a suitable candidate for phage therapy**

401 Staphylococcal *Myoviridae* phages have a broad host range (Lobocka et al. 2012; Cui et  
402 al. 2017). In particular, kayvirus can infect multiple species of *Staphylococcus* (Lobocka et al.  
403 2012). *Staphylococcus* species harbor various glycoepitopes (GlcNAc, GalNAc, or Glc) and two  
404 types of WTA backbone (RboP and GroP) (Endl et al. 1983; Brown et al. 2013). Commonly, the  
405 infectivity of staphylococcal phages that use glycoepitopes in the WTA as their receptors, e.g.  
406 phages from families *Siphoviridae* and *Podoviridae*, depend on the WTA type of the host. For  
407 example, *Siphoviridae* phage  $\phi$ 187 (a *S. aureus* ST395 specific phage) strictly requires the  
408 GalNAc residue in GroP WTA. The phage is not infective toward *S. aureus*, which has RboP

409 WTA (Winstel et al. 2014; Li et al. 2015). The phage can infect coagulase-negative  
410 staphylococci (CoNS) including animal-related CoPS, *S. pseudintermedius* (Winstel et al. 2014).  
411 The same study also showed that *Siphoviridae* phage  $\phi$ 11 and  $\phi$ 80 $\alpha$  (*S. aureus*-specific phages)  
412 can infect *S. aureus* but not *Staphylococcus* species with GroP WTA. Therefore, the host range  
413 of phages belong to this group likely depends on the type of WTA.

414 In this study, we found that  $\phi$ SA039 could infect different *Staphylococcus* species with  
415 GroP or RboP WTA. The phage exhibited at least moderate infectivity toward *S.*  
416 *pseudintermedius* isolates and strong infection toward CoNS, all of which lack of the  $\beta$ -GlcNAc  
417 residue in their WTA and have a GroP backbone. We confirmed that  $\phi$ SA039 can utilize GroP-  
418 or RboP WTA in *Staphylococcus* bacteria as its receptor. TagN-mediated glycosylation of WTA  
419 in *S. pseudintermedius* SP015 likely inhibits the infection of  $\phi$ SA039.

420 Staphylococcal *Siphoviridae* phage often exhibit broad host range, but are specific for  
421 bacteria within the same species (Xia et al. 2011; Li et al. 2015). In this study, we demonstrated  
422 that SP phages can engage in inter-species infectivity in *Staphylococcus* that possess GroP WTA.  
423 Three SP phages ( $\phi$ SP120,  $\phi$ SP197, and  $\phi$ SP276) exhibited strong infectivity toward 19 isolates  
424 of *S. pseudintermedius* and 11 CoNS isolates. Unlike other CoNS, *S. saprophyticus* i.e. CCM883  
425 strain has RboP-type WTA (Endl et al. 1983); hence, SP phages cannot infect this species. The  
426 absence of non-beneficial genes (toxin, virulence, and antibiotic resistance) in the genomes of  
427  $\phi$ SP120,  $\phi$ SP197, and  $\phi$ SP276 lead us to consider them as potential antimicrobial agents for  
428 control of *S. pseudintermedius* infection.

429 Phage host range is an important criterion when considering a candidate phage for  
430 therapeutic application. According to our results, staphylococcal *Myoviridae*, especially those of

431 kayvirus group, are the best candidates in terms of host range; however, to establish efficient  
432 treatment, it will be necessary to precisely determine the bacteria responsible for each infection.  
433 For example, if one desires to treat *S. pseudintermedius* infection without affecting *S. aureus*, the  
434 use of a SP *Siphoviridae* phage represents an alternative. For practical phage therapy, the use of  
435 strictly lytic phages that lack non-desirable genes would be preferable. Although our newly isolated  
436 SP phages are lysogenic, non-desirable genes are absent from their genome; thus, selection of  
437 spontaneous mutant phages that are exclusively lytic would be beneficial for practical  
438 applications. A recent report described a practical method for screening for spontaneous mutant  
439 lytic phages from a lysogenic strain (Gutiérrez et al. 2018), suggesting promising future  
440 applications of such phages in therapy.

#### 441 **Glycosylation of RboP WTA protects *S. aureus* cell from infection by SP phages**

442 Surface carbohydrate moieties are essential for bacterial communication and phage–  
443 bacteria and host–pathogen interactions (Weidenmaier et al. 2005; Brown et al. 2013). Most *S.*  
444 *aureus* strains produce RboP WTA substituted with  $\alpha$ - and/or  $\beta$ -GlcNAc residues. Many *S.*  
445 *aureus* strains have lost a major genetic barrier against phage infection, the CRISPR-Cas system  
446 (Brussow et al. 2004). Consequently, *S. aureus* frequently exchanges genetic material via phage-  
447 mediated horizontal gene transfer (HGT) events (Xia and Wolz 2014; Li et al. 2015). The  
448 difference in WTA structure determines efficient HGT among *Staphylococcus* bacteria.  
449 Staphylococcal *Siphoviridae* mediates HGT among *Staphylococcus* (Xia and Wolz 2014). Host  
450 recognition of phages from this family depends on WTA structure (Azam and Tanji 2019b). For  
451 example, *Siphoviridae* phages capable of infecting *S. aureus* (SA *Siphoviridae*), such as  $\phi$ 11 and  
452  $\phi$ 80A, can recognize GlcNAc of RboP WTA, but cannot recognize GroP WTA of CoNS (see

453 illustration in Fig 4). On the other hand, *Siphoviridae* that infect other *Staphylococcus* species  
454 have rarely been reported.

455         Within *S. aureus* species, the ST395 lineage harbors a unique WTA containing 1,3-  
456 glycerol-phosphate (GroP) modified with  $\alpha$ -GalNAc and D-alanine (Winstel et al. 2013; Winstel  
457 et al. 2014). The WTA structure of the ST395 lineage resembles that of CoNS and *S.*  
458 *pseudintermedius*. *Siphoviridae* phages capable of infecting PS187 (a representative strain of the  
459 ST395 lineage) can also infect CoNS and other species with similar WTA structure (Winstel et  
460 al. 2014). In this study, we characterized *Siphoviridae* phages capable of infecting *S.*  
461 *pseudintermedius* (termed SP *Siphoviridae*). We demonstrated that the *S. pseudintermedius*  
462 strains used in our study have GroP WTA. In a representative strain (SP015), we observed that  
463 our SP *Siphoviridae* phages required glycosylated GroP WTA. A nonsense mutation resulting in  
464 deletion of the C-terminus of *tagN*, encoding glycosyl transferase for GroP WTA, caused a  
465 significant decrease in adsorption of SP phages onto SP015 but improved adsorption of  $\phi$ SA039.  
466 Adsorption of phages was not observed in the present of tunicamycin (an antibiotic which  
467 inhibits WTA synthesis), suggesting that SP phages and  $\phi$ SA039 required WTA for infection but  
468 glycosylation by TagN was dispensable for  $\phi$ SA039.

469         Interestingly, we showed that SP phages could recognize *S. aureus* harboring non-  
470 glycosylated WTA (due to lack of TarM and TarS). Although *S. aureus* lacking both TarM and  
471 TarS is not likely to be present in nature, our finding indicates that glycosylation of RboP WTA  
472 of *S. aureus* is a strategy used by the bacteria to protect themselves against infection by SP  
473 *Siphoviridae*, thereby limiting the HGT across different species with different WTA backbones.  
474 Similar strategies have been documented in other reports (Li et al. 2015) showing that TarM  
475 protects *S. aureus* against the lytic activity of *Podoviridae*. Staphylococcal *Podoviridae* require

476 precise WTA glycosylation pattern for infection. TarM-mediated  $\alpha$ -GlcNAc glycosylation in  
477 RboP WTA prevents infection of *Podoviridae* while TarS-mediated  $\beta$ -GlcNAc glycosylation is  
478 important for *S. aureus* susceptibility to *Podoviridae*. Our findings reveal a novel strategy by  
479 which *S. aureus* protects itself against infection by phages capable of specifically infecting  
480 phylogenetically distant species. These finding provide novel insight into biology of  
481 staphylococcal phage. We suggested that host recognition mechanism of staphylococcal phage is  
482 likely more complex than our current understanding.

483

484 **Acknowledgements:** We thank Professor Kenji Kurokawa at the Faculty of Pharmaceutical  
485 Science of Nagasaki International University for providing us with the deletion mutant of  
486 RN4220.

487

#### 488 **Compliance with ethical standards**

489 Conflict of interest: The authors declare that they have no competing interests.

490 Ethical approval: This article does not contain any studies with human participants or animal  
491 performed by any of the authors.

492

493 **References**

- 494 Alves DR, Gaudion A, Bean JE, Perez Esteban P, Arnot TC, Harper DR, Kot W, Hansen LH,  
495 Enright MC, Jenkins ATA (2014) Combined use of bacteriophage K and a novel  
496 bacteriophage to reduce *Staphylococcus aureus* biofilm formation. *Appl Environ Microbiol*  
497 80:6694–6703 . doi: 10.1128/AEM.01789-14
- 498 Asheshov EA, Jevons MP (1963) The effect of heat on the ability of a host strain to support the  
499 growth of a *Staphylococcus* phage. *J Gen Microbiol* 31:97–107 . doi: 10.1099/00221287-  
500 31-1-97
- 501 Azam AH, Hoshiga F, Takeuchi I, Miyanaga K, Tanji Y (2018) Analysis of phage resistance in  
502 *Staphylococcus aureus* SA003 reveals different binding mechanisms for the closely related  
503 Twort-like phages  $\phi$ SA012 and  $\phi$ SA039. *Appl. Microbiol. Biotechnol.* In press
- 504 Azam AH, Tanji Y (2019a) Bacteriophage-host arm race : An update on the mechanism of phage  
505 resistance in bacteria and revenge of the phage with the perspective for phage therapy. *Appl*  
506 *Microbiol Biotechnol* 103:2121–2131 . doi: 10.1007/s00253-019-09629-x
- 507 Azam AH, Tanji Y (2019b) Peculiarities of *Staphylococcus aureus* phages and their possible  
508 application in phage therapy. *Appl Microbiol Biotechnol In press.* doi: 10.1007/s00253-  
509 019-09810-2
- 510 Bannoehr J, Ben Zakour NL, Waller AS, Guardabassi L, Thoday KL, Van Den Broek AHM,  
511 Fitzgerald JR (2007) Population genetic structure of the *Staphylococcus intermedius* group:  
512 Insights into agr diversification and the emergence of methicillin-resistant strains. *J*  
513 *Bacteriol* 189:8685–8692 . doi: 10.1128/JB.01150-07



- 514 Bannoehr J, Franco A, Iurescia M, Battisti A, Fitzgerald JR (2009) Molecular diagnostic  
515 identification of *Staphylococcus pseudintermedius*. J Clin Microbiol 47:469–471 . doi:  
516 10.1128/JCM.01915-08
- 517 Blaiotta G, Fusco V, Ercolini D, Pepe O, Coppola S (2010) Diversity of *Staphylococcus* species  
518 strains based on partial kat (catalase) gene sequences and design of a PCR-restriction  
519 fragment length polymorphism assay for identification and differentiation of coagulase-  
520 positive species (*S. aureus*, *S. delphini*, *S. hyicus*, *S. intermedius*, *S. pseudintermedius*, and *S.*  
521 *schleiferi* subsp. *coagulans*). J Clin Microbiol 48:192–201 . doi: 10.1128/JCM.00542-09
- 522 Brown S, Santa Maria JP, Walker S (2013) Wall teichoic acids of Gram-positive bacteria. Annu  
523 Rev Microbiol 67:313–336 . doi: 10.1146/annurev-micro-092412-155620
- 524 Brown S, Xia G, Luhachack LG, Campbell J, Meredith TC, Chen C, Winstel V, Gekeler C,  
525 Irazoqui JE, Peschel A, Walker S (2012) Methicillin resistance in *Staphylococcus aureus*  
526 requires glycosylated wall teichoic acids. Proc Natl Acad Sci 109:18909–18914 . doi:  
527 10.1073/pnas.1209126109
- 528 Brussow H, Canchaya C, Hardt W-D (2004) Phages and the evolution of bacterial pathogens:  
529 from genomic rearrangements to lysogenic conversion. Microbiol Mol Biol Rev 68:560–  
530 602 . doi: 10.1128/MMBR.68.3.560-602.2004
- 531 Capparelli R, Nocerino N, Lanzetta R, Silipo A, Amoresano A, Giangrande C, Becker K,  
532 Blaiotta G, Evidente A, Cimmino A, Iannaccone M, Parlato M, Medaglia C, Roperto S,  
533 Roperto F, Ramunno L, Iannelli D (2010) Bacteriophage-resistant *Staphylococcus aureus*  
534 mutant confers broad immunity against staphylococcal infection in mice. PLoS One 5. doi:  
535 10.1371/journal.pone.0011720

- 536 Chen W, Zhang Y, Yeo WS, Bae T, Ji Q (2017) Rapid and efficient genome editing in  
537 *Staphylococcus aureus* by using an engineered CRISPR/Cas9 system. J Am Chem Soc  
538 139:3790–3795 . doi: 10.1021/jacs.6b13317
- 539 Cui Z, Guo X, Dong K, Zhang Y, Li Q, Zhu Y, Zeng L, Tang R, Li L (2017) Safety assessment  
540 of *Staphylococcus* phages of the family *Myoviridae* based on complete genome sequences.  
541 Sci Rep 7. doi: 10.1038/srep41259
- 542 Cui Z, Song Z, Wang Y, Zeng L, Shen W, Wang Z, Li Q, He P, Qin J, Guo X (2012) Complete  
543 genome sequence of wide-host-range *Staphylococcus aureus* phage JD007. J Virol  
544 86:13880–1 . doi: 10.1128/JVI.02728-12
- 545 Deghorain M, Bobay LM, Smeesters PR, Bousbata S, Vermeersch M, Perez-Morga D, Drèze  
546 PA, Rocha EPC, Touchon M, Van Melderen L (2012) Characterization of novel phages  
547 isolated in coagulase-negative staphylococci reveals evolutionary relationships with  
548 *Staphylococcus aureus* phages. J Bacteriol 194:5829–5839 . doi: 10.1128/JB.01085-12
- 549 Endl J, Seidl HP, Fiedler F, Schleifer KH (1983) Chemical composition and structure of cell wall  
550 teichoic acids of staphylococci. Arch Microbiol 135:215–223 . doi: 10.1007/BF00414483
- 551 Enright MC, Robinson DA, Randle G, Feil EJ, Grundmann H, Spratt BG, Walsh CT (2002) The  
552 evolutionary history of methicillin-resistant *Staphylococcus aureus* (MRSA). Proc Natl  
553 Acad Sci 99:7687–7692
- 554 Gutiérrez D, Fernández L, Rodríguez A, García P (2018) Practical method for isolation of phage  
555 deletion mutants. Methods Protoc 1:6. doi: 10.3390/mps1010006
- 556 Hyman P, Abedon ST (2010) Bacteriophage host range and bacterial resistance. Adv Appl

- 557 Microbiol 70:217–248
- 558 Iwano H, Inoue Y, Takasago T, Kobayashi H, Furusawa T, Taniguchi K, Fujiki J, Yokota H,  
559 Usui M, Tanji Y, Hagiwara K, Higuchi H, Tamura Y (2018) Bacteriophage  $\Phi$ SA012 has a  
560 broad host range against *Staphylococcus aureus* and effective lytic capacity in a mouse  
561 mastitis model. *Biology (Basel)* 7:8 doi: 10.3390/biology7010008
- 562 Jeong DW, Cho H, Lee H, Li C, Garza J, Fried M, Bae T (2011) Identification of the P3  
563 promoter and distinct roles of the two promoters of the SaeRS two-component system in  
564 *Staphylococcus aureus*. *J Bacteriol* 193:4672–4684 . doi: 10.1128/JB.00353-11
- 565 Kloos WE, Bannerman TL (1994) Update on clinical significance of coagulase-negative  
566 staphylococci. *Clin Microbiol Rev* 7:117–140
- 567 Li X, Gerlach D, Du X, Larsen J, Stegger M, Kühner P, Peschel A, Xia G, Winstel V (2015) An  
568 accessory wall teichoic acid glycosyltransferase protects *Staphylococcus aureus* from the  
569 lytic activity of *Podoviridae*. *Sci Rep* 5:17219 . doi: 10.1038/srep17219
- 570 Li X, Koç C, Kühner P, Stierhof Y-D, Krismer B, Enright MC, Penadés JR, Wolz C, Stehle T,  
571 Cambillau C, Peschel A, Xia G (2016) An essential role for the baseplate protein Gp45 in  
572 phage adsorption to *Staphylococcus aureus*. *Nat Publ Gr* 6:26455. doi: 10.1038/srep26455
- 573 Łobocka M, Hejnowicz MS, Dabrowski K, Gozdek A, Kosakowski J, Witkowska M, Ulatowska  
574 MI, Weber-Dabrowska B, Kwiatek M, Parasion S, Gawor J, Kosowska H, Głowacka A  
575 (2012) Genomics of Staphylococcal Twort-like Phages - Potential Therapeutics of the Post-  
576 Antibiotic Era. *Adv Virus Res* 83:143–216 . doi: 10.1016/B978-0-12-394438-2.00005-0
- 577 Moodley A, Stegger M, Ben Zakour NL, Fitzgerald JR, Guardabassi L (2009) Tandem repeat

- 578 sequence analysis of staphylococcal protein A (spa) gene in methicillin-resistant  
579 *Staphylococcus pseudintermedius*. Vet Microbiol 135:320–326 . doi:  
580 10.1016/j.vetmic.2008.09.070
- 581 Morita M, Fischer CR, Mizoguchi K, Yoichi M, Oda M, Tanji Y, Unno H (2002) Amino acid  
582 alterations in Gp38 of host range mutants of PP01 and evidence for their infection of an  
583 ompC null mutant of *Escherichia coli* O157:H7. FEMS Microbiol Lett 216:243–248 . doi:  
584 10.1016/S0378-1097(02)01025-X
- 585 O’Flaherty S, Coffey A, Edwards R, Meaney W, Fitzgerald GF, Ross RP (2004) Genome of  
586 staphylococcal phage K: A new lineage of myoviridae infecting Gram-positive bacteria  
587 with a low G+C content. J Bacteriol 186:2862–2871 . doi: 10.1128/JB.186.9.2862-  
588 2871.2004
- 589 Osada K, Takeuchi I, Miyanaga K, Tanji Y (2017) Coevolution between *Staphylococcus aureus*  
590 isolated from mastitic milk and its lytic bacteriophage  $\phi$ SA012 in batch co-culture with  
591 serial transfer. Biochem Eng J 126:16–23 . doi: 10.1016/j.bej.2017.06.022
- 592 Pompilio A, De Nicola S, Crocetta V, Guarnieri S, Savini V, Carretto E, Di Bonaventura G  
593 (2015) New insights in *Staphylococcus pseudintermedius* pathogenicity: Antibiotic-resistant  
594 biofilm formation by a human wound-associated strain. BMC Microbiol 15. doi:  
595 10.1186/s12866-015-0449-x
- 596 Sakoulas G, Eliopoulos GM, Fowler VG, Moellering RC, Novick RP, Lucindo N, Yeaman MR,  
597 Bayer AS (2005) Reduced susceptibility of *Staphylococcus aureus* to Vancomycin and  
598 Platelet Microbicidal protein correlates with defective autolysis and loss of accessory gene  
599 regulator (agr) function. Antimicrob Agents Chemother 49:2687–2692 . doi:

- 600 10.1128/AAC.49.7.2687–2692.2005
- 601 Synnott AJ, Kuang Y, Kurimoto M, Yamamichi K, Iwano H, Tanji Y (2009) Isolation from  
602 sewage influent and characterization of novel *Staphylococcus aureus* bacteriophages with  
603 wide host ranges and potent lytic capabilities. *Appl Environ Microbiol* 75:4483–4490 . doi:  
604 10.1128/AEM.02641-08
- 605 Takeuchi I, Osada K, Azam AH, Asakawa H, Miyanaga K, Tanji Y (2016) The presence of two  
606 receptor-binding proteins contributes to the wide host range of staphylococcal twort-like  
607 phages. *Appl Environ Microbiol* 82:5763–5774 . doi: 10.1128/AEM.01385-16
- 608 Weidenmaier C, Peschel A, Xiong Y, Kristian SA, Dietz K, Yeaman MR, Bayer AS (2005) Lack  
609 of wall teichoic acids in *Staphylococcus aureus* leads to reduced interactions with  
610 endothelial cells and to attenuated virulence in a rabbit model of endocarditis. *J Infect Dis*  
611 191:1771–1777 . doi: 10.1086/429692
- 612 Winstel V, Liang C, Sanchez-Carballo P, Steglich M, Munar M, Broker BM, Penadés JR, Nübel  
613 U, Holst O, Dandekar T, Peschel A, Xia G (2013) Wall teichoic acid structure governs  
614 horizontal gene transfer between major bacterial pathogens. *Nat Commun* 4 doi:  
615 10.1038/ncomms3345
- 616 Winstel V, Sanchez-Carballo P, Holst O, Xia G, Peschel A (2014) Biosynthesis of the unique  
617 wall teichoic acid of *Staphylococcus aureus* lineage ST395. *MBio* 5 doi:  
618 10.1128/mBio.00869-14
- 619 Xia G, Corrigan RM, Winstel V, Goerke C, Gründling A, Peschel A (2011) Wall teichoic acid-  
620 dependent adsorption of staphylococcal siphovirus and myovirus. *J Bacteriol* 193:4006–

- 621 4009 . doi: 10.1128/JB.01412-10
- 622 Xia G, Maier L, Sanchez-Carballo P, Li M, Otto M, Holst O, Peschel A (2010) Glycosylation of  
623 wall teichoic acid in *Staphylococcus aureus* by TarM. J Biol Chem 285:13405–13415 . doi:  
624 10.1074/jbc.M109.096172
- 625 Xia G, Wolz C (2014) Phages of *Staphylococcus aureus* and their impact on host evolution.  
626 Infect Genet Evol 21:593–601 . doi: 10.1016/j.meegid.2013.04.022
- 627 Zhu X, Liu D, Singh AK, Drolia R, Bai X, Tenguria S, Bhunia AK (2018) Tunicamycin  
628 mediated inhibition of wall teichoic acid affects *Staphylococcus aureus* and *Listeria*  
629 *monocytogenes* cell morphology, biofilm formation and virulence. Front Microbiol 9. doi:  
630 10.3389/fmicb.2018.01352
- 631
- 632

633 **Figure legends**

634 Fig 1. Adsorption of  $\phi$ SA039 and its derivative mutants (spontaneous mutant  $\phi$ M1 and  $\phi$ M2,  
635 recombinant phage harboring point mutations in ORF100 [ $\phi$ rM1/r-100], and recombinant  
636 phage harboring point mutations in ORF100 and ORF102 [ $\phi$ rM1/r-100&102]) onto (a)  
637 SA003 and *tarS* deletion mutant (SA003 $\Delta$ TarS), (b) wild-type RN4220, *tarM* deletion  
638 mutant (RN $\Delta$ TarM), *tarS* deletion mutant (RN $\Delta$ TarS), and *tarM/tarS* double deletion  
639 mutant (RN $\Delta$ TarM $\Delta$ TarS). Statistical significance ( $P < 0.05$ ) is indicated with \*.

640 Fig 2. Infectivity of SP phages ( $\phi$ SP120,  $\phi$ SP197, and  $\phi$ SP276) toward RN4220 and its deletion  
641 mutants; *tarM* deletion mutant (RN $\Delta$ TarM), *tarS* deletion mutant (RN $\Delta$ TarS), and  
642 *tarM/tarS* double deletion mutant (RN $\Delta$ TarM $\Delta$ TarS), *tagO* deletion mutant (RN $\Delta$ TagO),  
643 *tarM* complemented mutant RN $\Delta$ TarM $\Delta$ TarS::pLIP3.TarM, and *tarS* complemented mutant  
644 RN $\Delta$ TarM $\Delta$ TarS::pLIP3.TarS, as determined by adsorption assay.

645 Fig 3. (a) Mutation that causes an early stop codon in *tagN* of SP015-R1. Susceptibility of SP015  
646 wild-type, tunicamycin-induced Sp015 (final concentration 5 $\mu$ g/ml), *tagN* spontaneous  
647 mutant (SP015-R1), and TagN-complemented SP015-R1 to all phages, as determined by  
648 spot test (b); to phage  $\phi$ SP120, as determined by adsorption assay (c); and against phage  
649  $\phi$ SA039, as determined by adsorption assay.

650 Fig 4. Mechanism of recognition of WTA by staphylococcal phages: (a) SA *Siphoviridae* and  
651 *Myoviridae* recognize glycosylated RboP WTA; (b) SP *Siphoviridae* and *Myoviridae*  
652 recognize glycosylated GroP WTA; and (c) SP *Siphoviridae* and *Myoviridae* recognize non-  
653 glycosylated RboP WTA. \*Glycosylation by TagN is based on a report in the *S. aureus*  
654 ST395 lineage (Winstel et al. 2014).

655

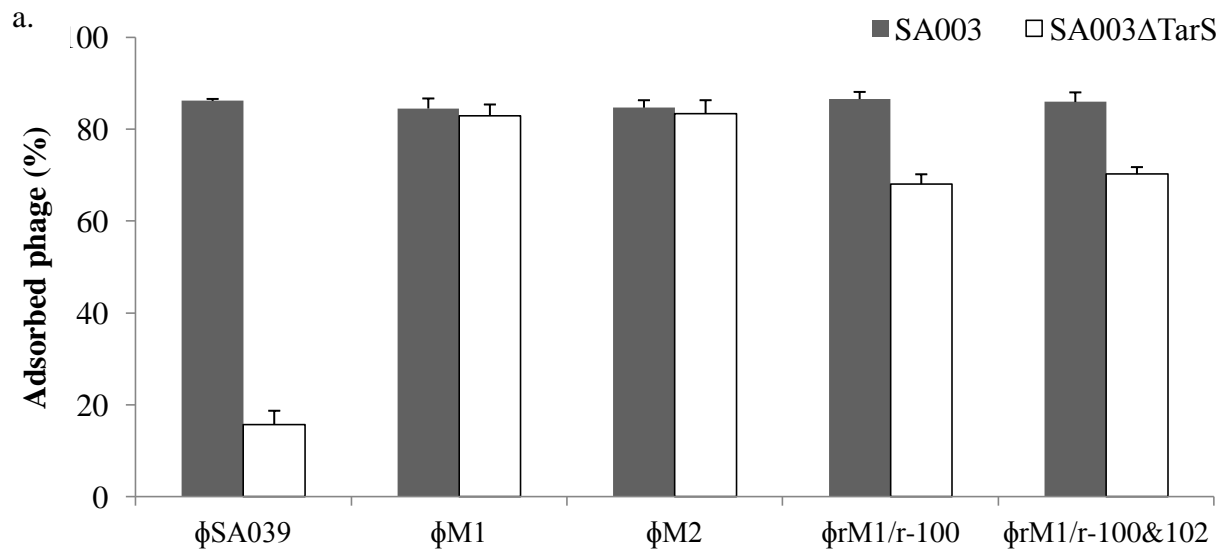

656

657 b.

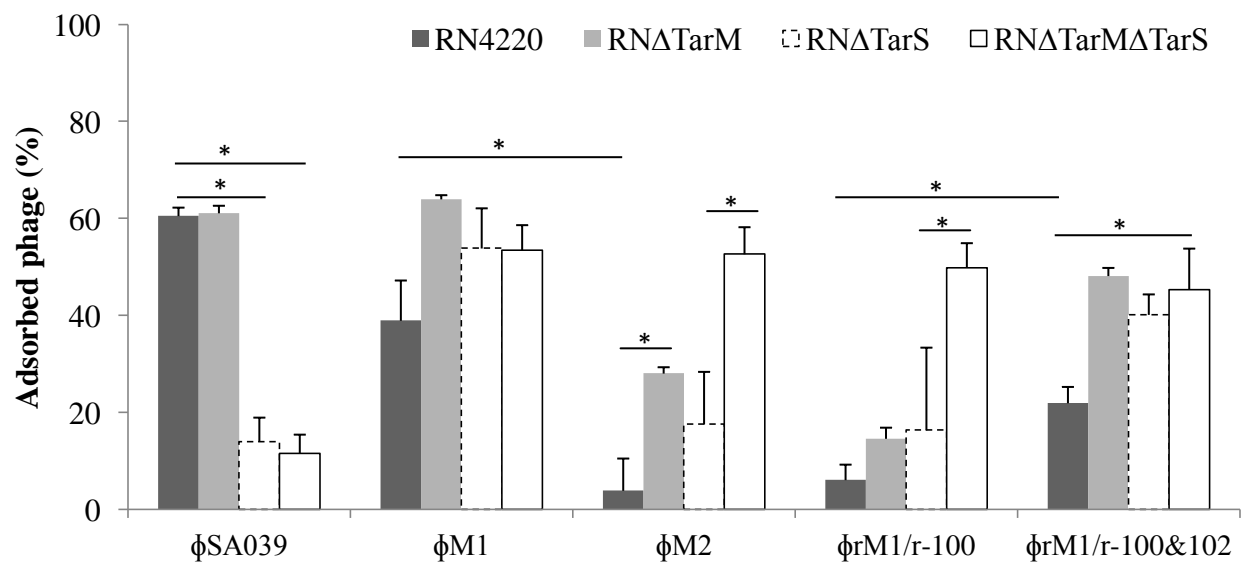

658

659 Fig 1.

660

661

662



663

664

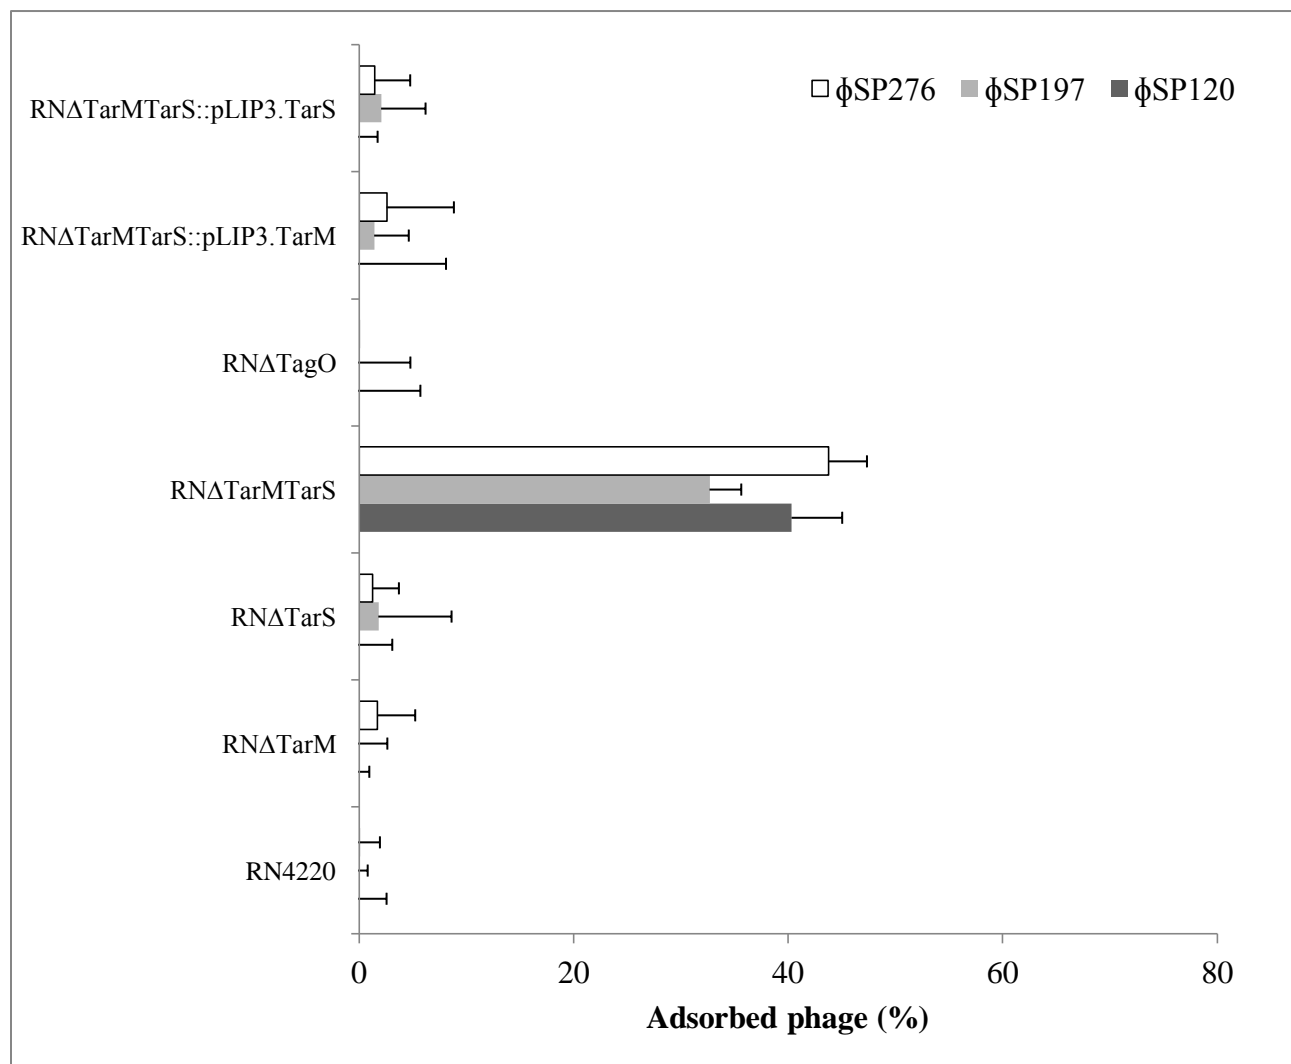

665

666

667 Fig. 2

668

669

670

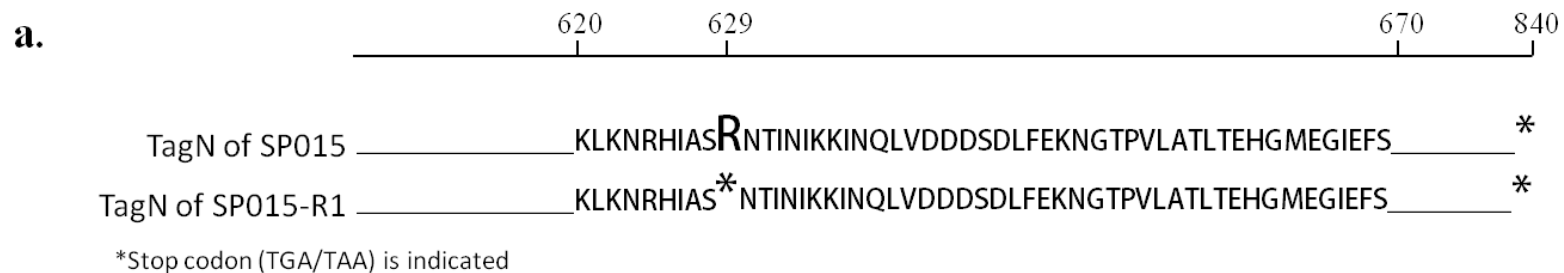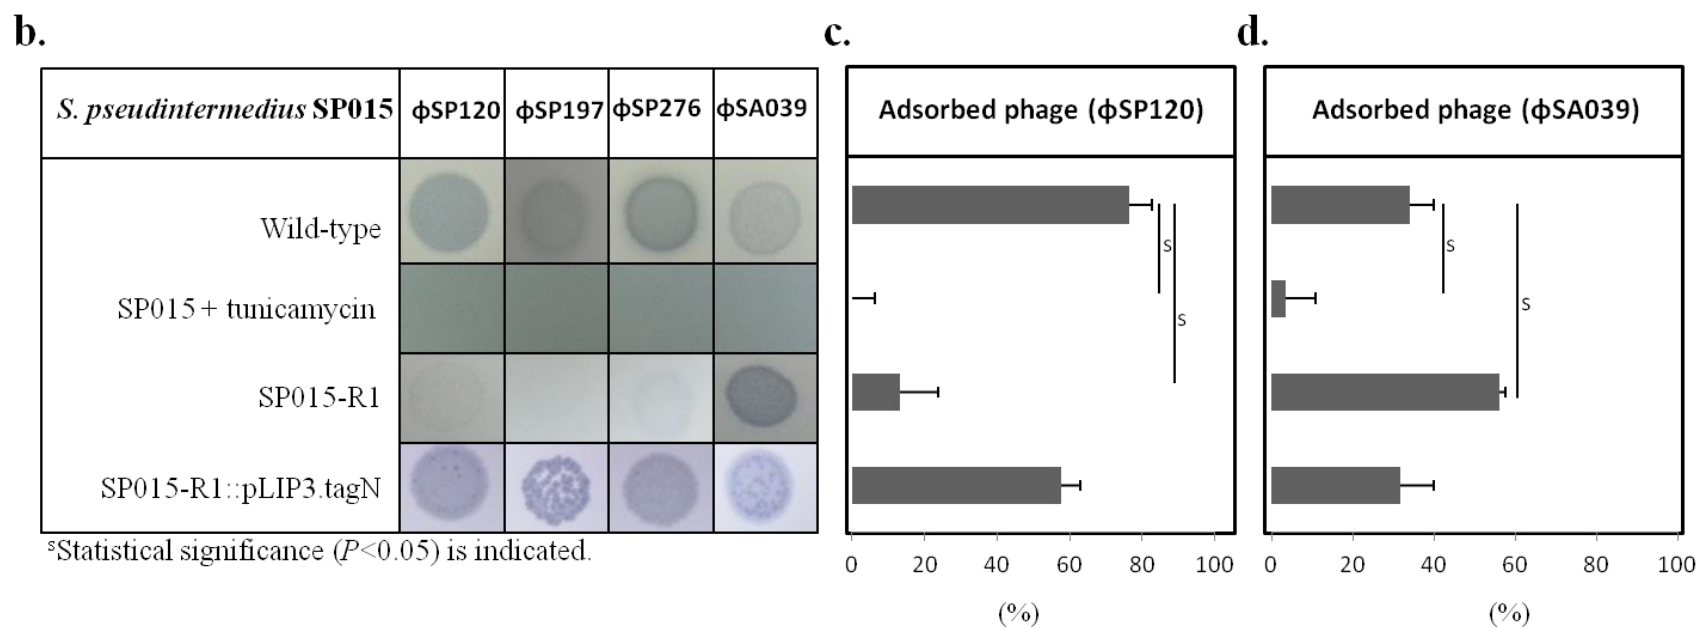

675

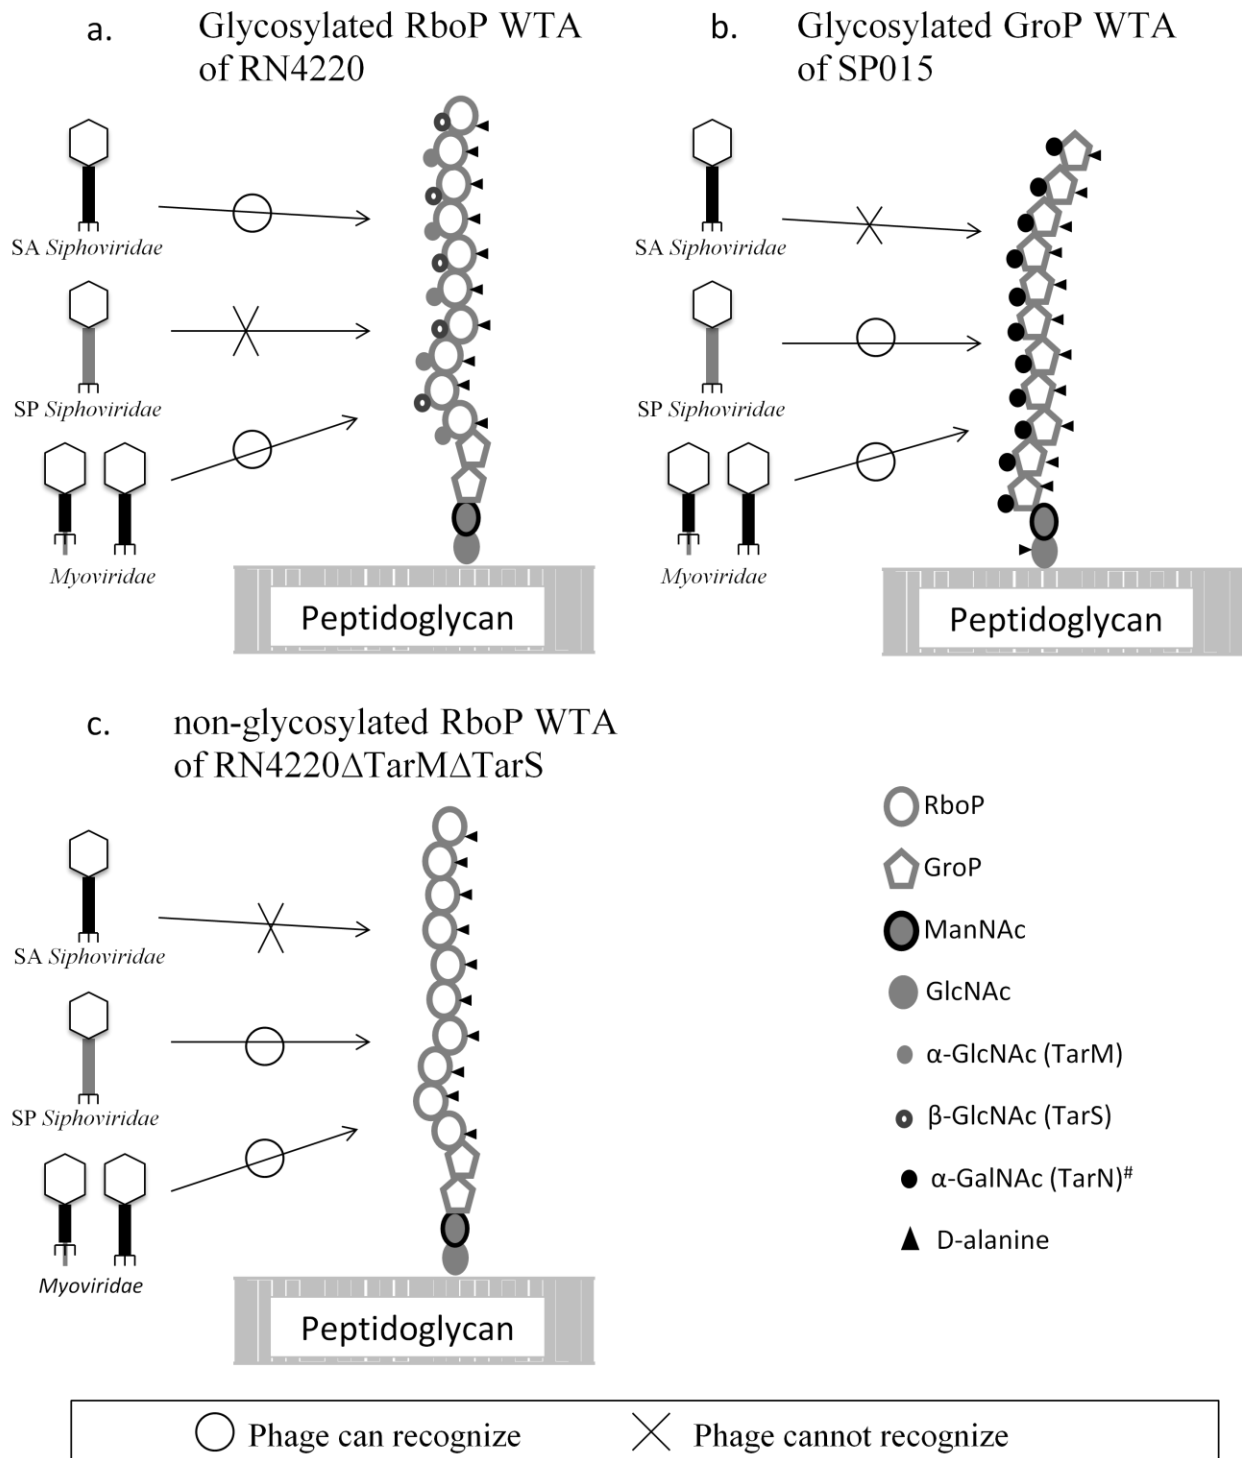

676

677 Fig. 4

**Table 1.** Bacterial strains, phages and plasmids used in this study

| Bacterial strain, phage or plasmid                                                                                              | Description                                                                                                                                                                                                                                                        | Reference                                        |
|---------------------------------------------------------------------------------------------------------------------------------|--------------------------------------------------------------------------------------------------------------------------------------------------------------------------------------------------------------------------------------------------------------------|--------------------------------------------------|
| <b>Bacteria</b>                                                                                                                 |                                                                                                                                                                                                                                                                    |                                                  |
| <i>E. coli</i> JM109                                                                                                            | Competent cells. Genotype <i>recA1, endA1, gyrA96, thi-1, hsdR17(r<sub>K</sub><sup>-</sup> m<sub>K</sub><sup>+</sup>), e14<sup>-</sup> (mcrA<sup>-</sup>), supE44, relA1, Δ (lac-proAB)/F<sup>+</sup>[traD36, proAB<sup>+</sup>, lac I<sup>q</sup>, lacZΔM15].</i> | (TAKARA, Shiga, Japan)                           |
| <i>S. aureus</i> RN4220                                                                                                         | Transformable strain: restriction-deficient ( <i>hsdR</i> <sup>-</sup> ), <i>rsbU</i> <sup>-</sup> , <i>agr</i> <sup>-</sup> .                                                                                                                                     | (DSMZ culture collection, Braunschweig, Germany) |
| <i>S. aureus</i> RNΔTarM                                                                                                        | <i>S. aureus</i> RN4220 lacking <i>tarM</i> gene                                                                                                                                                                                                                   | (Takeuchi et al. 2016)                           |
| <i>S. aureus</i> RNΔTO                                                                                                          | <i>S. aureus</i> RN4220 disruptant of <i>tagO</i> gene                                                                                                                                                                                                             | (Azam et al. 2018)                               |
| <i>S. aureus</i> RNΔOatA                                                                                                        | <i>S. aureus</i> RN4220 with deleted <i>oatA</i> gene                                                                                                                                                                                                              | (Azam et al. 2018)                               |
| <i>S. aureus</i> RNΔTarS                                                                                                        | <i>S. aureus</i> RN4220 lacking <i>tarS</i> gene                                                                                                                                                                                                                   | (Kurokawa et al. 2013)                           |
| <i>S. aureus</i> RNΔTarMΔTarS                                                                                                   | <i>S. aureus</i> RN4220 lacking <i>tarM</i> and <i>tarS</i> genes                                                                                                                                                                                                  | (Kurokawa et al. 2013)                           |
| RNΔTarMΔTarS.pLIP3.TarM                                                                                                         | <i>S. aureus</i> RNΔTarMΔTarS harboring pLIP3.TarM                                                                                                                                                                                                                 | This study                                       |
| RNΔTarMΔTarS.pLIP3.TarS                                                                                                         | <i>S. aureus</i> RNΔTarMΔTarS harboring pLIP3.TarS                                                                                                                                                                                                                 | This study                                       |
| <i>S. aureus</i> RNΔTarMΔTarSΔOatA                                                                                              | <i>S. aureus</i> RN4220 lacking <i>tarM</i> , <i>tarS</i> and <i>oatA</i> genes                                                                                                                                                                                    | This study                                       |
| <i>S. aureus</i> SA003                                                                                                          | <i>S. aureus</i> isolated from milk of mastitic cow                                                                                                                                                                                                                | (Synnott et al. 2009)                            |
| SA003ΔtarS                                                                                                                      | <i>S. aureus</i> SA003 deficient in <i>tarS</i>                                                                                                                                                                                                                    | (Azam et al. 2018)                               |
| SA003ΔtarS::pLIP3.TarS                                                                                                          | Complemented SA003ΔtarS with pLIP3.TarS                                                                                                                                                                                                                            | (Azam et al. 2018)                               |
| <i>S. aureus</i> SA001, 002, 003, 009, 019,020, 021,026, 028,029,031,033                                                        | <i>S. aureus</i> isolated from milk of mastitic cow                                                                                                                                                                                                                | (Synnott et al. 2009)                            |
| <i>S. pseudintermedius</i> SP015, 017, 023, 040, 055, 042, 070, 079, 092, 120, 145, 188, 190, 195, 197, 251, 253, 276, 294, 296 | <i>S. pseudintermedius</i> isolated from skin of Canine pyoderma                                                                                                                                                                                                   | This study                                       |
| SP015.R1                                                                                                                        | <i>S. pseudintermedius</i> SP015 with premature stop codon in <i>tagN</i>                                                                                                                                                                                          | This study                                       |
| SP015.R1.pLIP3.TagN                                                                                                             | Complemented SP015.R1 with pLIP3.TagN                                                                                                                                                                                                                              | This study                                       |
| <i>S. epidermidis</i> NBRC 100911                                                                                               | <i>S. epidermidis</i> isolated from nose                                                                                                                                                                                                                           | (NBRC culture collection, Shizuoka, Japan)       |
| <i>S. warneri</i> IAM-1296                                                                                                      | <i>S. warneri</i> isolated from skin lesion                                                                                                                                                                                                                        | (JCM culture collection, Tsukuba, Japan)         |
| <i>S. epidermidis</i> NBRC12993                                                                                                 | Standard strain for Japanese pharmacopeia (microbial assay for antibiotics)                                                                                                                                                                                        | (NBRC culture collection, Shizuoka, Japan)       |
| <i>S. caprae</i> JMUB-50                                                                                                        | Strain isolated from patient at Jichi Medical University hospital                                                                                                                                                                                                  | Jichi Medical University culture collection      |
| <i>S. epidermidis</i> JMUB-51                                                                                                   | Strain isolated from patient at Jichi Medical University hospital                                                                                                                                                                                                  | Jichi Medical University culture collection      |
| <i>S. haemolyticus</i> JMUB-57                                                                                                  | Strain isolated from patient at Jichi Medical University hospital                                                                                                                                                                                                  | Jichi Medical University culture collection      |

Table 2. Spot test of phages toward *Staphylococcus aureus*, *S. pseudintermedius* and 12 CoNS.  
*S. caprae* JMUB-145

|                                  |                                                                                                           |                                             |
|----------------------------------|-----------------------------------------------------------------------------------------------------------|---------------------------------------------|
| <i>S. hominis</i> JMUB-323       | Strain isolated from patient at Jichi Medical University hospital                                         | Jichi Medical University culture collection |
| <i>S. warneri</i> JMUB-339       | Strain isolated from patient at Jichi Medical University hospital                                         | Jichi Medical University culture collection |
| <i>S. saprophyticus</i> JMUB-344 | Strain isolated from patient at Jichi Medical University hospital                                         | Jichi Medical University culture collection |
| <i>S. lugdunensis</i> JMUB-1729  | Strain isolated from patient at Jichi Medical University hospital                                         | Jichi Medical University culture collection |
| <i>S. capitis</i> JMUB-1992      | Strain isolated from patient at Jichi Medical University hospital                                         | Jichi Medical University culture collection |
| <b>Phages</b>                    |                                                                                                           |                                             |
| φSA012, φSA039                   | <i>S. aureus</i> phage isolated from sewage influent in Japan.                                            | (Synnott et al. 2009)                       |
| φM1                              | Spontaneous mutant of φSA039                                                                              | This study                                  |
| φM2                              | Spontaneous mutant of φSA039                                                                              | This study                                  |
| φrM1/r-100                       | Chimeric phage of φSA039 harboring mutated ORF100 of φM1                                                  | This study                                  |
| φM1/r-100&102                    | Chimeric phage of φSA039 harboring mutated ORF100 and ORF102 of φM1                                       | This study                                  |
| φSP120                           | <i>S. pseudintermedius</i> specific phage isolated by Mitomycin induction                                 | This study                                  |
| φSP197                           | <i>S. pseudintermedius</i> specific phage isolated by Mitomycin induction                                 | This study                                  |
| φSP276                           | <i>S. pseudintermedius</i> specific phage isolated by Mitomycin induction                                 | This study                                  |
| <b>Plasmid</b>                   |                                                                                                           |                                             |
| pNL9164                          | <i>E. coli/S. aureus</i> shuttle vector, AmpR ( <i>E. coli</i> ), ErmR ( <i>S. aureus</i> ).              | (Sigma-Aldrich, St. Louis, MO, USA)         |
| pNL.m1.100                       | Plasmid pNL9164 with inserted mutated-ORF100 from φM1                                                     | This study                                  |
| pNL.m1.102                       | Plasmid pNL9164 with inserted mutated-ORF102 from φM1                                                     | This study                                  |
| pLI50                            | <i>E. coli/S. aureus</i> shuttle vector, AmpR ( <i>E. coli</i> ), CmR ( <i>S. aureus</i> ).               | (Addgene, MA, USA)                          |
| pLIP3                            | Plasmid pLI50 with promoter P3 from <i>S. aureus</i> , CmR ( <i>S. aureus</i> ), AmpR ( <i>E. coli</i> ). | (Takeuchi et al. 2016)                      |
| pLIP3.TO                         | pLIP3 with inserted <i>tagO</i> gene from SA003.                                                          | (Azam et al. 2018)                          |
| pLIP3.TagN                       | pLIP3 with inserted <i>tagN</i> gene from SP015.                                                          | This study                                  |
| pCasSA                           | Plasmid for genome editing in <i>S. aureus</i> by CRISPR/Cas9 system                                      | (Chen et al. 2017)                          |
| pCasSA-oatA                      | pCasSA plasmid with spacer and editing template of the <i>oatA</i> gene from RN4220.                      | (Azam et al. 2018)                          |
| pLIP3.oatA                       | pLIP3 with inserted <i>oatA</i> gene from RN4220                                                          | (Azam et al. 2018)                          |

678

679

680

|          |         | <i>S. pseudintermedius</i> |          |                   |                   |                        |       |                       |       |                         |       |       |                       |       |       |                   |           |                   |          |          |           |
|----------|---------|----------------------------|----------|-------------------|-------------------|------------------------|-------|-----------------------|-------|-------------------------|-------|-------|-----------------------|-------|-------|-------------------|-----------|-------------------|----------|----------|-----------|
|          |         | MSSP                       |          |                   |                   |                        |       |                       | MRSP  |                         |       |       |                       |       |       |                   |           |                   |          |          |           |
|          |         | SP017                      | SP023    | SP042             | SP070             | SP079                  | SP092 | SP120                 | SP015 | SP040                   | SP055 | SP145 | SP188                 | SP190 | SP195 | SP197             | SP251     | SP253             | SP276    | SP294    | SP296     |
| MLST     |         | NT                         | NT       | NT                | NT                | NT                     | NT    | 71                    | 110   | 194                     | 71    | 36    | NT                    | NT    | NT    | NT                | NT        | 5                 | NT       | NT       |           |
| WTA type |         | GroP                       |          |                   |                   |                        |       |                       |       |                         |       |       |                       |       |       |                   |           |                   |          |          |           |
| Phage    | φSA039  | C                          | T        | T                 | C                 | N                      | T     | T                     | C     | T                       | T     | T     | T                     | N     | T     | C                 | C         | C                 | C        | T        | T         |
|          | φSA012  | C                          | T        | T                 | C                 | N                      | T     | T                     | C     | T                       | T     | C     | C                     | T     | C     | C                 | C         | C                 | C        | T        | T         |
|          | φSP0120 | C                          | C        | C                 | C                 | N                      | C     | T                     | C     | C                       | C     | C     | T                     | C     | T     | C                 | T         | T                 | C        | C        | C         |
|          | φSP0197 | C                          | C        | C                 | C                 | N                      | C     | C                     | C     | C                       | C     | C     | C                     | C     | C     | T                 | C         | C                 | C        | C        | C         |
|          | φSP276  | C                          | C        | C                 | C                 | N                      | C     | C                     | C     | C                       | C     | C     | C                     | C     | C     | C                 | C         | C                 | T        | C        | C         |
|          | φDP001  | C                          | T        | T                 | T                 | N                      | N     | N                     | C     | T                       | T     | N     | N                     | N     | N     | C                 | C         | C                 | N        | N        | N         |
|          |         | <i>S. aureus</i>           |          |                   |                   |                        |       |                       |       |                         |       |       | <i>S. epidermidis</i> |       |       | <i>S. warneri</i> |           | <i>S. capitis</i> |          |          |           |
|          |         | SA003                      | RN420    | ATCC6538          | <i>S. warneri</i> | SA002                  | SA009 | SA019                 | SA020 | SA021                   | SA026 | SA028 | SA029                 | SA031 | SA033 | NBRC100911        | NBRC12993 | JMUB-51           | IAM-1296 | JMUB-339 | JMUB-1992 |
| WTA type |         | RboP                       |          |                   |                   |                        |       |                       |       |                         |       |       | GroP                  |       |       | GroP              |           | GroP              |          |          |           |
| Phage    | φSA039  | C                          | C        | N                 | T                 | C                      | C     | C                     | C     | C                       | C     | C     | C                     | C     | C     | C                 | C         | C                 | C        | C        | C         |
|          | φSA012  | C                          | C        | T                 | C                 | N                      | C     | C                     | C     | C                       | T     | C     | C                     | C     | C     | C                 | C         | C                 | C        | C        | C         |
|          | φSP120  | N                          | N        | N                 | N                 | N                      | N     | N                     | N     | N                       | N     | N     | N                     | N     | N     | C                 | C         | C                 | C        | C        | C         |
|          | φSP197  | N                          | N        | N                 | N                 | N                      | N     | N                     | N     | N                       | N     | N     | N                     | N     | N     | C                 | C         | C                 | C        | C        | C         |
|          | φSP276  | N                          | N        | N                 | N                 | N                      | N     | N                     | N     | N                       | N     | N     | N                     | N     | N     | C                 | C         | C                 | C        | C        | C         |
|          | φDP001  | N                          | N        | N                 | N                 | N                      | N     | N                     | N     | N                       | N     | N     | N                     | N     | N     | C                 | T         | T                 | C        | C        | C         |
|          |         | <i>S. caprae</i>           |          | <i>S. hominis</i> |                   | <i>S. haemolyticus</i> |       | <i>S. lugdunensis</i> |       | <i>S. saprophyticus</i> |       |       |                       |       |       |                   |           |                   |          |          |           |
|          |         | JMUB-50                    | JMUB-145 | JMUB-323          |                   | JMUB-57                |       | JMUB-1729             |       | JMUB-344                |       |       |                       |       |       |                   |           |                   |          |          |           |

|                                                                                                                                                                                                                                                             |        | GroP |   |   |   |   | RboP <sup>#</sup> |
|-------------------------------------------------------------------------------------------------------------------------------------------------------------------------------------------------------------------------------------------------------------|--------|------|---|---|---|---|-------------------|
| Phage                                                                                                                                                                                                                                                       | φSA039 | C    | C | C | C | C | C                 |
|                                                                                                                                                                                                                                                             | φSA012 | C    | C | C | C | C | C                 |
|                                                                                                                                                                                                                                                             | φSP120 | C    | C | C | C | C | N                 |
|                                                                                                                                                                                                                                                             | φSP197 | C    | C | C | C | C | N                 |
|                                                                                                                                                                                                                                                             | φSP276 | C    | C | C | C | C | N                 |
| MRSA= Methicillin-resistant <i>S. pseudintermedius</i><br>MSSP= Methicillin-susceptible <i>S. pseudintermedius</i><br>NT means Non type<br>*C = Clear, T = Turbid, and N = No plaque<br>#WTA was likely similar to the strain reported by Endl et al (1983) |        |      |   |   |   |   |                   |

681

682

683

684

Supplemental Table S1. Primers used in this study.

| Primer name | Sequence                                  | Description                                                                                                                                  | Reference  |
|-------------|-------------------------------------------|----------------------------------------------------------------------------------------------------------------------------------------------|------------|
| F_orf94     | ACAGTCTATTGTAAGC                          | Primer to amplified <i>orf94</i> of $\phi$ SA039                                                                                             | This study |
| R_orf94     | CTAATGTTTCAAATTGCTGAGG                    | Primer to amplified <i>orf94</i> of $\phi$ SA039                                                                                             | This study |
| F_orf95     | CCTCAGCAATTTGAAACATTAG                    | Primer to amplified <i>orf54</i> of $\phi$ SA039                                                                                             | This study |
| R_orf95     | GTGCATCTATGAGAGCAAAG                      | Primer to amplified <i>orf95</i> of $\phi$ SA039                                                                                             | This study |
| F_orf96     | CAGACCTTATTCAAGCTATAATG                   | Primer to amplified <i>orf96</i> of $\phi$ SA039                                                                                             | This study |
| R_orf96     | GGTGGGTTTGTTCATTAGAC                      | Primer to amplified <i>orf96</i> of $\phi$ SA039                                                                                             | This study |
| F_orf97-98  | CCATACGATAGTGAAGTAGTAAC                   | Primer to amplified <i>orf97</i> of $\phi$ SA039                                                                                             | This study |
| R_orf98-97  | CTTGTTGATACGGGTTTATCT                     | Primer to amplified <i>orf98</i> of $\phi$ SA039                                                                                             | This study |
| R1_orf98    | CTGTTGTATCTCCTGGAATAATC                   | Primer to amplified <i>orf98</i> of $\phi$ SA039                                                                                             | This study |
| R2_orf98    | GTTTCAGCACTAGCATTATTAG                    | Primer to amplified <i>orf98</i> of $\phi$ SA039                                                                                             | This study |
| R3_orf98    | CATAAGTCTACGAACACGAG                      | Primer to amplified <i>orf98</i> of $\phi$ SA039                                                                                             | This study |
| F_orf99     | CTCGTGTTTCGTAGACTTATG                     | Primer to amplified <i>orf99</i> of $\phi$ SA039                                                                                             | This study |
| R_orf99     | CTTGACTGGTAACTTTCTTATC                    | Primer to amplified <i>orf99</i> of $\phi$ SA039                                                                                             | This study |
| R_orf101    | GAGCTGTTATGTTCCATACG                      | Primer to amplified <i>orf101</i> of $\phi$ SA039                                                                                            | This study |
| F_orf100    | GCAA <u>AGCTT</u> GGGTTGATTGACCCCTCTTT    | Primer to amplified <i>orf100</i> of $\phi$ SA039 with <i>Hind</i> III site for insertion into pNL9164 and used for homologous recombination | This study |
| R_orf100    | ATAT <u>GTACA</u> CTCCTAAAGTGATTAATTCCTGC | Primer to amplified <i>orf100</i> of $\phi$ SA039 with <i>Bsr</i> GI site for insertion into pNL9164 and used for homologous recombination   | This study |
| R_orf100    | CCATCGTCTCTGATACTACTTAG                   | Primer to amplified <i>orf100</i> of $\phi$ SA039                                                                                            | This study |
| M_orf100    | CAGCAAGTGAGATAACAACCTG                    | Primer to amplified <i>orf100</i> of $\phi$ SA039                                                                                            | This study |



|          |                                               |                                                                                                                                             |                      |
|----------|-----------------------------------------------|---------------------------------------------------------------------------------------------------------------------------------------------|----------------------|
| F_orf102 | GCAA <u>AAGCTT</u> CAAGAAGCTATGATGGAAA<br>TGC | Primer to amplified <i>orf102</i> of $\phi$ SA039 with <i>HindIII</i> site for insertion into pNL9164 and used for homologous recombination | This study           |
| R_orf102 | ATAT <u>GTACAGTCT</u> ACATACCCATCCCAAC        | Primer to amplified <i>orf102</i> of $\phi$ SA039 with <i>BsrGI</i> site for insertion into pNL9164 and used for homologous recombination   | This study           |
| F_tagN   | GCAG <u>GATCC</u> GGGATGTACTAAGAAAGAG<br>TC   | Primer to amplified <i>tagN</i> of <i>S. pseudintermedius</i> with <i>BamHI</i> site for insertion into pLIP3                               | This study           |
| R_tagN   | ATAA <u>AAGCTT</u> GTTCACCCTCTTTCCATACA<br>T  | Primer to amplified <i>tagN</i> of <i>S. pseudintermedius</i> with <i>HindIII</i> site for insertion into pLIP3                             | This study           |
| F_tagF1  | CAGGGTTTGGAGGGATGATTG                         | Primer to amplified <i>tagF1</i> of <i>S. pseudintermedius</i>                                                                              | This study           |
| R_tagF1  | AGTTAGTTGAAGGGCAGCCC                          | Primer to amplified <i>tagF1</i> of <i>S. pseudintermedius</i>                                                                              | This study           |
| F_tagF2  | GATTTCAAACACGAAACATATAGC                      | Primer to amplified <i>tagF2</i> of <i>S. pseudintermedius</i>                                                                              | This study           |
| R_tagF2  | CAATCATCCCTCCAAACCCTG                         | Primer to amplified <i>tagF2</i> of <i>S. pseudintermedius</i>                                                                              | This study           |
| M_tagF2  | CTGTAGAATAACGGTTCGGTG                         | Primer to amplified <i>tagF2</i> of <i>S. pseudintermedius</i>                                                                              | This study           |
| F_tagVN  | GATATGATTAAGGAAGTGGTTAC                       | Primer to amplified <i>tagVN</i> of <i>S. pseudintermedius</i>                                                                              | This study           |
| R_tagN   | CGATGATTGGTCTGTTGTTG                          | Primer to amplified <i>tagN</i> of <i>S. pseudintermedius</i>                                                                               | This study           |
| F_tagO   | GATTGCGAATGAATGAGACAG                         | Primer to amplified <i>tagO</i> of <i>S. pseudintermedius</i>                                                                               | This study           |
| R_tagO   | GTACTTCCATGTGGCATTCC                          | Primer to amplified <i>tagO</i> of <i>S. pseudintermedius</i>                                                                               | This study           |
| SIspa-F  | AACCTGCGCCAAGTTTCGATGAAG                      | Primer for spa typing of <i>S. pseudintermedius</i>                                                                                         | Moodley et al. 2009  |
| SIspa-R  | CGTGGTTTGCTTTAGCTTCTGGC                       | Primer for spa typing of <i>S. pseudintermedius</i>                                                                                         | Moodley et al. 2009  |
| spaA-F   | AAGTAGTGATATTCTTGCT                           | Primer for spa typing of <i>S. pseudintermedius</i>                                                                                         | Ruscher et al. 2010  |
| spA-R    | CCAGGTTGAACGACATGCAT                          | Primer for spa typing of <i>S. pseudintermedius</i>                                                                                         | Ruscher et al. 2010  |
| SPspa1F  | CCGCTCTATTTTTAGGTTAATC                        | Primer for spa typing of <i>S. pseudintermedius</i>                                                                                         | Perreten et al. 2010 |

|                 |                                              |                                                                                  |                      |
|-----------------|----------------------------------------------|----------------------------------------------------------------------------------|----------------------|
| SIspaFlkR<br>1  | CGTAACAACCTCAATGCTACATA                      | Primer for spa typing of <i>S. pseudintermedius</i>                              | Perreten et al. 2010 |
| tuf-F           | CAATGCCACAAACTCG                             | Primer for typing of <i>S. pseudintermedius</i>                                  | Bannoehr et al. 2007 |
| tuf-R           | GCGACTGTACTTGCACAAGCA                        | Primer for typing of <i>S. pseudintermedius</i>                                  |                      |
| cpn60-F         | GCGACTGTACTTGCACAAGCA                        | Primer for typing of <i>S. pseudintermedius</i>                                  |                      |
| cpn60-R         | AACTGCAACCGCTGTAATG                          | Primer for typing of <i>S. pseudintermedius</i>                                  |                      |
| pta-F           | GTGGGTATCGTATTACCAGAAGG                      | Primer for typing of <i>S. pseudintermedius</i>                                  |                      |
| pta-R           | GCAGAACCTTTTGTGAGAAGC                        | Primer for typing of <i>S. pseudintermedius</i>                                  |                      |
| agrD-F          | GGGGTATTATTACAATCATTC                        | Primer for typing of <i>S. pseudintermedius</i>                                  |                      |
| agrD-R          | GTGATGGGAAAATAAAGGATTG                       | Primer for typing of <i>S. pseudintermedius</i>                                  |                      |
| F_seqA.oat<br>A | GCATCTAGAGAAAATTATATGAACCTGCTT<br>GG         | Primer to amplify A region of <i>oatA</i> gene with <i>Xba</i> I site for pCasSA |                      |
| R_seqA.oa<br>tA | CAAATCCCATAGTAACGGTG                         | Primer to amplified A region of <i>oatA</i> gene                                 | Azam et al. 2018     |
| F_seqB.oat<br>A | CACCGTTACTATGGGATTTGGTTGATTC<br>ATTACTGCAAAC | Primer to amplified B region of <i>oatA</i> gene                                 | Azam et al. 2018     |
| R_seqB.oa<br>tA | ATACTCGAGCTCTTCCCATAGAAATTGGG                | Primer to amplify B region of <i>oatA</i> gene with <i>Xho</i> I site for pCasSA | Azam et al. 2018     |

685  
686  
687  
688  
689  
690  
691  
692  
693  
694  
695  
696  
697  
698  
699  
700  
701  
702

703  
704

a.

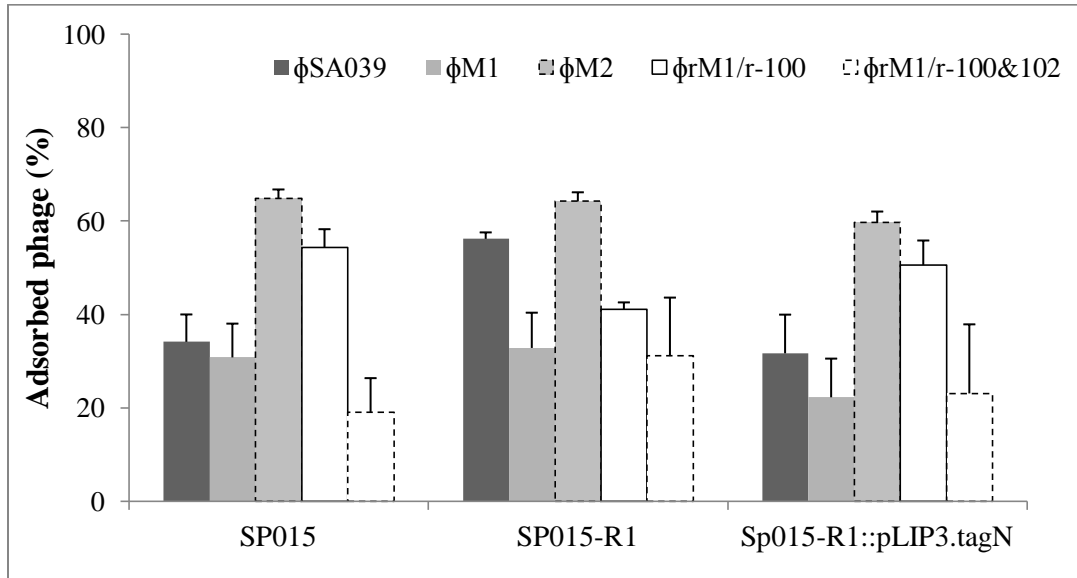

705  
706

b.

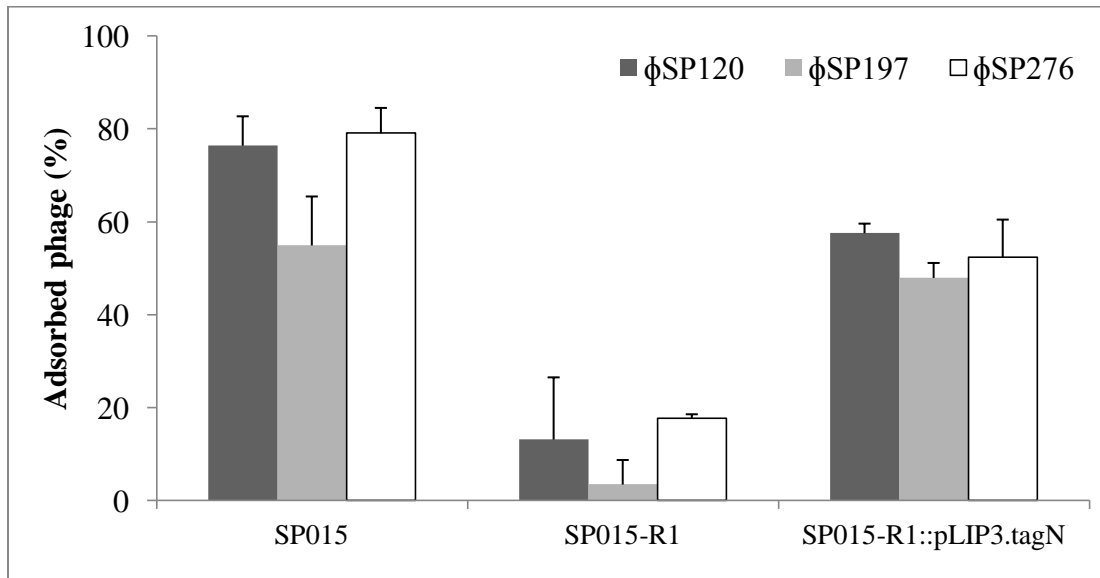

707  
708

709 Supplemental Figure S2

710  
711  
712  
713  
714  
715

716

Supplemental Table S3. Spacers present in CRISPR of *S. pseudintermedius* SP079

| Spacer | Sequence                        | Closest phage sequence in database* | Phage genome accession number |
|--------|---------------------------------|-------------------------------------|-------------------------------|
| 1      | TTTTAATCACTATACGATTATGAAAGCCT   | NA                                  |                               |
| 2      | GAACAGTTTGATTTACCTTATCGCTATATT  | NA                                  |                               |
| 3      | TGTTTCTGTTTGTACTTTTATTCTGTAC    | NA                                  |                               |
| 4      | TGAACATTACCGAACCTCTTGTGATTAA    | NA                                  |                               |
| 5      | GCGAACAACGGTATGCTTACGATGTTAGGT  | φSP120                              | AP019560                      |
| 6      | TCGCATTAATCAAGAATCAAAAGGGTTGC   | NA                                  |                               |
| 7      | AAAAAGCCAGTACAAGGTTCTATGGTTTCA  | NA                                  |                               |
| 8      | ATTAAGAACAATATAAATGTATCGATTTCA  | Phage SN8                           | MF428481                      |
| 9      | GCAATGGATCAATTGAAGGCTCGTCAACAA  | NA                                  |                               |
| 10     | GTGTGTCATCAGACTTTACACCTTCAAATAC | NA                                  |                               |
| 11     | GAACTCTTAAAGTATCTTTTAGGACACTT   | NA                                  |                               |
| 12     | AAAGATTATGCCATCTTCAGTTACTTTAAC  | NA                                  |                               |
| 13     | GATGAGAGGTGTAAAAGCACAATTGCATGA  | NA                                  |                               |
| 14     | TGTACGTTCAAACGGTTCTCTTTTAATTT   | NA                                  |                               |
| 15     | CGGCACAGATTGTGTGATTTGTTGACCTGC  | NA                                  |                               |
| 16     | TCAAAAGTATTTTCGTCGAGATGGAGCGACT | φSP197                              | AP019561                      |
| 17     | TGAAGATTTTCCACGCCAATGTATTTTTAT  | Phage 2638A                         | AY954954                      |
| 18     | TAAAATCAGAAACAAAAGGGCAAGCGGTT   | NA                                  |                               |
| 19     | CATTACCTTTGTTTGCCTTGTGTTGATICT  | NA                                  |                               |
| 20     | GTAACTGAACTCGAGTGTGGCGCTTGA     | NA                                  |                               |
| 21     | ACAGGCTTAAAGAATCATTACAGTTTGCTA  | NA                                  |                               |
| 22     | TTGACCGTGCAAAAATTAATACAAGGCGC   | NA                                  |                               |
| 23     | GTTATGATGTTTGGCGATATGGGTCGTCGT  | NA                                  |                               |

\*National Center for Biotechnology Information (NCBI) database was used in this study.

NA means the data was not available in the database.

717

718

719

720
